# Supplementary material for: Impacts of updated reaction kinetics on the global GEOS-Chem simulation of atmospheric chemistry
Source: Copernicus journal article supplement (doi:10.5194/egusphere-2023-1374), 2023-08-24
Supplement: Supplementary file 1 [file egusphere-2023-1374-supplement.pdf]

# Supplement to: "Impacts of updated reaction kinetics on the global GEOS-Chem simulation of atmospheric chemistry"

Kelvin H. Bates<sup>1,2</sup>, Mathew J. Evans<sup>3,4</sup>, Barron H. Henderson<sup>5</sup>, and Daniel J. Jacob<sup>1</sup>

<sup>1</sup>School of Engineering and Applied Sciences, Harvard University, Cambridge, MA 02138, USA

<sup>2</sup>now at: NOAA Chemical Sciences Laboratory, Earth System Research Laboratories, & Cooperative Institute for Research in Environmental Sciences, University of Colorado, Boulder, CO 80305, USA

<sup>3</sup>Wolfson Atmospheric Chemistry Laboratories, Department of Chemistry, University of York, York, UK

<sup>4</sup>National Centre for Atmospheric Science, University of York, York, UK

<sup>5</sup>U.S. Environmental Protection Agency, Research Triangle Park, NC 27711, USA

**Correspondence:** Kelvin Bates (kelvin.bates@noaa.gov)

## Contents

|                                                       |            |
|-------------------------------------------------------|------------|
| <b>S1 Rate coefficient formulas</b>                   | <b>S2</b>  |
| <b>S2 GEOS-Chem species names and abbreviations</b>   | <b>S3</b>  |
| <b>S3 Figures of updated rate coefficients</b>        | <b>S5</b>  |
| 5 <b>S4 GEOS-Chem updates not included in Table 1</b> | <b>S13</b> |
| <b>S5 Additional impacts of updates</b>               | <b>S20</b> |

## S1 Rate coefficient formulas

This section provides formulas for calculating the more complex rate coefficients used in Table 1 in the main text. In each of the following equations,  $T$  represents temperature in Kelvin,  $M$  represents the number density of air in molecules  $\text{cm}^{-3}$ , and the rate coefficients returned by the individual formulas are in units of  $\text{cm}^3 \text{ molecule}^{-1} \text{ s}^{-1}$  unless otherwise noted.

The formula for the rate coefficient of propane + OH,  $f_P$ , is given by the following equation:

$$f_P(a, b, c) = 7.6 \times 10^{-12} \times e^{(-585/T)} / (1 + a \times (\frac{300}{T})^b \times e^{(c/T)}) \quad (\text{S1})$$

The formulas for the rate coefficients of the two hydroxyacetone + OH branches,  $f_{HA}$  and  $f_{HB}$ , are given by the following equations, where  $\text{MAX}[x, y]$  returns the maximum of the values of  $x$  or  $y$ :

$$f_{HA}(a, b) = a \times e^{(b/T)} \times \text{MAX}[0, (1 - 23.7 \times e^{(-T/60)})] \quad (\text{S2})$$

$$f_{HB}(a, b) = a \times e^{(b/T)} \times (1 - \text{MAX}[0, (1 - 23.7 \times e^{(-T/60)})]) \quad (\text{S3})$$

A number of termolecular association reactions appear in Table 1, with rate coefficients given by the following equation. This version includes a multiplication by  $M$  in order to return a value with units  $\text{cm}^3 \text{ molecule}^{-1} \text{ s}^{-1}$  that can be treated like the rate coefficient of a standard bimolecular reaction. When the formula does not appear with a fifth argument ( $z$ ), the value can be assumed as 0.6.

$$f_t(a, b, x, y, z) = \frac{M \times a \times (\frac{298}{T})^b}{1 + \frac{M \times a \times (\frac{298}{T})^b}{x \times (\frac{298}{T})^y}} \times z^{[1/(1 + [\log_{10}(\frac{M \times a \times (298/T)^b}{x \times (298/T)^y})]^2)]} \quad (\text{S4})$$

Some termolecular association reactions also have an activation pathway, whereby the excited intermediate can fall apart instead of yielding the recombination production. While these appear to be simple bimolecular reactions, their coupling with the association branch produces a pressure dependence. Similarly to the termolecular association reactions, the rate coefficient formula used here includes a multiplication by  $M$  in order to return a value with units  $\text{cm}^3 \text{ molecule}^{-1} \text{ s}^{-1}$  that can be treated like a standard bimolecular reaction rate coefficient. The activation pathway rate coefficient is given by the following equation:

$$f_b(a, b, x, y, c, d) = c \times e^{(-d/T)} \times (1 - \frac{f_t(a, b, x, y)}{x \times (\frac{298}{T})^y}) \quad (\text{S5})$$

For the reactions of OH + CO and OH + HNO<sub>3</sub>, both the association and activation pathways yield identical products, so their effective rate coefficient can be calculated as the sum of the two pathways:

$$f_a(a, b, x, y, c, d) = f_b(a, b, x, y, c, d) + f_t(a, b, x, y) \quad (\text{S6})$$

The PAN dissociation rate coefficient ( $f_d$ , units  $\text{s}^{-1}$ ) is calculated by dividing the equilibrium constant by the forward termolecular association rate coefficient, as in the following equation:

$$f_d(a, b, x, y) = \frac{f_t(a, b, x, y, 0.6)}{9.3 \times 10^{-29} \times e^{(14000/T)}} \quad (\text{S7})$$

35 Finally, prior to these updates, GEOS-Chem used unique rate coefficient formulas for the reactions of OH + HNO<sub>3</sub> and OH + CO, given by the following formulas:

$$f_x(a, b, c) = a \times e^{(460/T)} + M \times c \times e^{(1335/T)} / (1 + \frac{M \times c \times e^{(1335/T)}}{b \times e^{(2199/T)}}) \quad (\text{S8})$$

$$f_c(a, b, c, d) = f_t(a, 1.0, b, -1.3) + f_t(c, 0, d, -6.1) / M \quad (\text{S9})$$

## S2 GEOS-Chem species names and abbreviations

40 Table S1 provides common names and formulas for the species whose GEOS-Chem abbreviations are used in descriptions of updated reactions (Table 1, Tables S2-S4). For a complete list of GEOS-Chem species, including those listed in Table S5, see [the GEOS-Chem wiki](#).

Table S1: Species names and abbreviations from GEOS-Chem used in this work<sup>a</sup>

| GEOS-Chem name | Formula                                                     | Other names or description                               |
|----------------|-------------------------------------------------------------|----------------------------------------------------------|
| A3O2           | CH <sub>3</sub> CH <sub>2</sub> CH <sub>2</sub> OO          | Primary peroxy radical from propane                      |
| ACET           | CH <sub>3</sub> C(O)CH <sub>3</sub>                         | Acetone                                                  |
| ACTA           | CH <sub>3</sub> CO <sub>2</sub> H                           | Acetic acid                                              |
| ALD2           | CH <sub>3</sub> CHO                                         | Acetaldehyde                                             |
| AROMP4         | C <sub>4</sub> H <sub>4</sub> O <sub>3</sub> <sup>b</sup>   | Generic C <sub>4</sub> product from aromatic oxidation   |
| AROMP5         | C <sub>5</sub> H <sub>7</sub> O <sub>3</sub> <sup>b</sup>   | Generic C <sub>5</sub> product from aromatic oxidation   |
| AROMRO2        | N/A                                                         | Generic peroxy radical from aromatic oxidation           |
| ATO2           | CH <sub>3</sub> C(O)CH <sub>2</sub> OO                      | Peroxy radical from acetone                              |
| ATOOH          | CH <sub>3</sub> C(O)CH <sub>2</sub> OOH                     | Hydroperoxy-acetone                                      |
| BENZ           | C <sub>6</sub> H <sub>6</sub>                               | Benzene                                                  |
| B3O2           | CH <sub>3</sub> CH(OO)CH <sub>3</sub>                       | Secondary peroxy radical from propane                    |
| EOH            | CH <sub>3</sub> CH <sub>2</sub> OH                          | Ethanol                                                  |
| ETO2           | CH <sub>3</sub> CH <sub>2</sub> OO                          | Ethylperoxy radical                                      |
| GLYC           | HOCH <sub>2</sub> CHO                                       | Glycolaldehyde                                           |
| GLYX           | C <sub>2</sub> H <sub>2</sub> O <sub>2</sub>                | Glyoxal                                                  |
| HAC            | CH <sub>3</sub> C(O)CH <sub>2</sub> OH                      | Hydroxyacetone                                           |
| HMHP           | HOCH <sub>2</sub> OH                                        | Hydroxymethyl hydroperoxide                              |
| HMML           | C <sub>4</sub> H <sub>6</sub> O <sub>3</sub>                | Hydroxymethyl-methyl- $\alpha$ -lactone                  |
| HONIT          | C <sub>10</sub> H <sub>17</sub> NO <sub>4</sub>             | Second-generation monoterpene organonitrates             |
| HPALD2         | HOCH <sub>2</sub> C(CH <sub>3</sub> )=CHCHO                 | 1,4-C <sub>5</sub> -hydroperoxyaldehyde                  |
| ICN            | C <sub>5</sub> H <sub>7</sub> NO <sub>4</sub>               | Isoprene carbonyl nitrates                               |
| ICNOO          | C <sub>5</sub> H <sub>8</sub> NO <sub>7</sub>               | Peroxy radicals from isoprene carbonyl nitrates          |
| ICPDH          | C <sub>5</sub> H <sub>10</sub> O <sub>5</sub>               | Isoprene dihydroxy hydroperoxycarbonyl                   |
| IDN            | C <sub>5</sub> H <sub>8</sub> N <sub>2</sub> O <sub>6</sub> | Lumped isoprene dinitrates                               |
| IHN1           | C <sub>5</sub> H <sub>9</sub> NO <sub>4</sub>               | Isoprene 4,1-hydroxynitrate                              |
| INA            | C <sub>5</sub> H <sub>8</sub> NO <sub>4</sub>               | Alkoxy radical from INO2D                                |
| INO2B          | C <sub>5</sub> H <sub>8</sub> NO <sub>5</sub>               | $\beta$ -peroxy radicals from isoprene + NO <sub>3</sub> |

*Continued on next page*

Continued from previous page

| GEOS-Chem name | Formula                   | Other names or description                                     |
|----------------|---------------------------|----------------------------------------------------------------|
| INO2D          | $C_5H_8NO_5$              | $\delta$ -peroxy radicals from isoprene + $NO_3$               |
| IONITA         | $C_5H_9NO_4^b$            | Aerosol-phase organonitrates from isoprene                     |
| ITCN           | $C_5H_9NO_7$              | Lumped tetrafunctional isoprene carbonyl-nitrates              |
| ITHN           | $C_5H_{11}NO_7$           | Lumped tetrafunctional isoprene hydroxynitrates                |
| KO2            | $C_4H_5O_3^b$             | Peroxy radicals from $C_{3+}$ ketones                          |
| LIMO           | $C_{10}H_{16}$            | Limonene                                                       |
| LIMO2          | $C_{10}H_{17}O_3$         | Peroxy radical from limonene + OH                              |
| MACR           | $CH_2=C(CH_3)CHO$         | Methacrolein                                                   |
| MACR1OO        | $CH_2=C(CH_3)C(O)OO$      | Peroxyacyl radical from methacrolein + OH                      |
| MACR1OOH       | $CH_2=C(CH_3)C(O)OOH$     | Peracid from MACR1OO                                           |
| MAP            | $CH_3C(O)O_2H$            | Peroxyacetic acid                                              |
| MCO3           | $CH_3C(O)O_2$             | Peroxyacetyl radical                                           |
| MCRDH          | $C_4H_8O_3$               | Dihydroxy-methacrolein                                         |
| MCRENOL        | $C_4H_6O_2$               | Lumped enols from MVK/MACR oxidation                           |
| MCRHN          | $HOCH_2C(ONO_2)(CH_3)CHO$ | Hydroxynitrate from MACR                                       |
| MCRHNB         | $O_2NOCH_2C(OH)(CH_3)CHO$ | Hydroxynitrate from MACR                                       |
| MEK            | $CH_3C(O)CH_2CH_3$        | Methyl ethyl ketone                                            |
| MGLY           | $CH_3C(O)CHO$             | Methylglyoxal                                                  |
| MONITS         | $C_{10}H_{17}NO_4$        | Saturated first-generation monoterpene organonitrates          |
| MONITU         | $C_{10}H_{17}NO_4$        | Unsaturated first-generation monoterpene organonitrates        |
| MTPA           | $C_{10}H_{16}$            | Lumped $\alpha$ -pinene, $\beta$ -pinene, sabinene, and carene |
| MTPO           | $C_{10}H_{16}$            | Lumped terpenes aside from MTPA + LIMO                         |
| MVK            | $CH_2=CHC(O)CH_3$         | Methyl vinyl ketone                                            |
| MVKHCB         | $C_4H_6O_3$               | Hydroxy-carbonyl from MVK                                      |
| MVKN           | $C_4H_7NO_5$              | Hydroxynitrate from MVK                                        |
| MVKOOH         | $C_4H_7O_4$               | Peroxy radical from MVK + OH                                   |
| MO2            | $CH_3OO$                  | Methylperoxy radical                                           |
| MP             | $CH_3OOH$                 | Methyl hydroperoxide                                           |
| NPHEN          | $C_6H_5NO_3$              | Nitrophenols                                                   |
| OLND           | $C_{10}H_{16}NO_5$        | Peroxy radical from monoterpenes + $NO_3$                      |
| OLNN           | $C_{10}H_{16}NO_5$        | Peroxy radical from monoterpenes + $NO_3$                      |
| OTHRO2         | $CH_3CH_2OO^b$            | $C_2$ Peroxy radicals from sources besides ethane              |
| PAN            | $CH_3C(O)OONO_2$          | Peroxyacetyl nitrate                                           |
| PHEN           | $C_6H_6O$                 | Phenol                                                         |
| PIO2           | $C_{10}H_{17}O_3$         | Peroxy radical from monoterpenes                               |
| PIP            | $C_{10}H_{18}O_3$         | Hydroperoxide from PIO2                                        |
| PO2            | $HOCH_2CH(OO)CH_3$        | Peroxy radical from propene + OH                               |
| PRN1           | $O_2NOCH_2CH(OO)CH_3$     | Peroxy radical from propene + $NO_3$                           |
| PROPNN         | $CH_3C(O)CH_2ONO_2$       | Propanone nitrate                                              |
| PYAC           | $C_3H_4O_3$               | Pyruvic acid                                                   |
| R4N1           | $C_4.5H_8NO_5^b$          | Peroxy radical from $C_{4+}$ alkyl nitrates                    |
| R4O2           | $C_4.5H_9O_2^b$           | Peroxy radicals from $C_{4+}$ alkanes                          |
| R4P            | $C_4.5H_9OOH^b$           | $C_{4+}$ hydroperoxides                                        |

Continued on next page

Continued from previous page

| GEOS-Chem name | Formula                                              | Other names or description                |
|----------------|------------------------------------------------------|-------------------------------------------|
| RCHO           | CH <sub>3</sub> CH <sub>2</sub> CHO <sup>b</sup>     | C <sub>3+</sub> aldehydes                 |
| RCO3           | CH <sub>3</sub> CH <sub>2</sub> C(O)O <sub>2</sub>   | Peroxypropionyl radical                   |
| RCOOH          | C <sub>2</sub> H <sub>5</sub> C(O)OH <sup>b</sup>    | C <sub>3+</sub> acids                     |
| ROH            | C <sub>3</sub> H <sub>7</sub> OH <sup>b</sup>        | C <sub>3+</sub> alcohols                  |
| RP             | CH <sub>3</sub> CH <sub>2</sub> C(O)O <sub>2</sub> H | Peracid from RCO3                         |
| SOAGX          | C <sub>2</sub> H <sub>2</sub> O <sub>2</sub>         | Aerosol-phase glyoxal                     |
| SOAIE          | C <sub>5</sub> H <sub>10</sub> O <sub>3</sub>        | Aerosol-phase isoprene epoxydiols (IEPOX) |

<sup>a</sup>Species with GEOS-Chem names equivalent to their formulas are not included here.

<sup>b</sup>Effective formula (for C/N balance) for species that represent a lumped group of compounds.

### S3 Figures of updated rate coefficients

45 Figures S1-S9 show the absolute and relative changes made to GEOS-Chem reaction rate coefficients in this work. Reactions are grouped and organized as in Table 1 of the main text. For most reactions, values are shown across the temperature range 200 – 300 K; for pressure-dependent reactions, rate coefficients are instead shown as a function of altitude across the range 0 – 10 km, where the dependence of both temperature and pressure on altitude are shown in Figure S10. Reactions of the Criegee radicals are excluded due to their lack of temperature dependence.

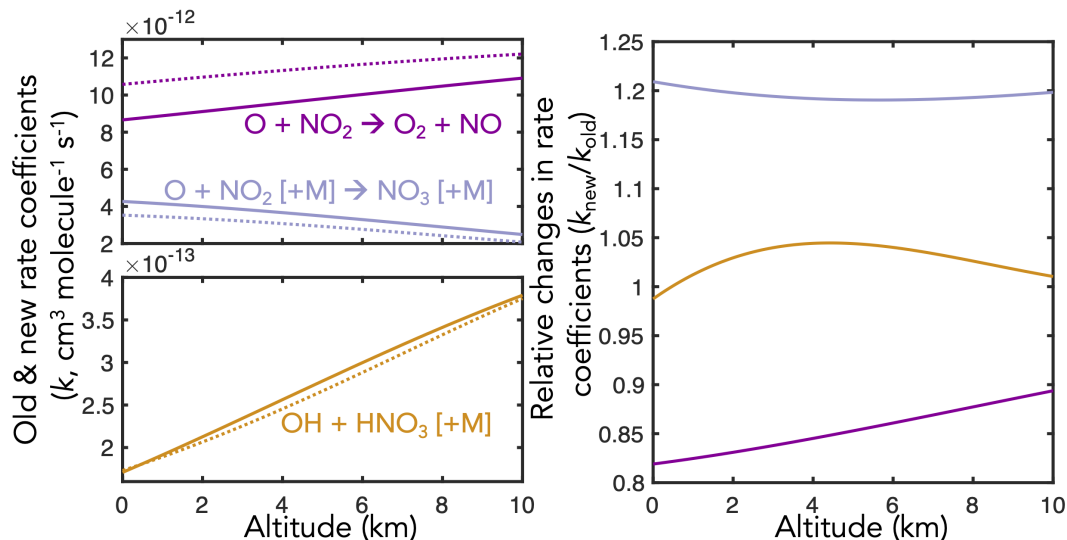

**Figure S1.** Base and updated rate coefficients (left) and relative difference (right) for pressure- and temperature-dependent reactions in the NO<sub>y</sub> family as functions of altitude (where variation of temperature and pressure with altitude is shown in Figure S10). Reactions are separated onto different scales in the top and bottom panels to better show their ranges.

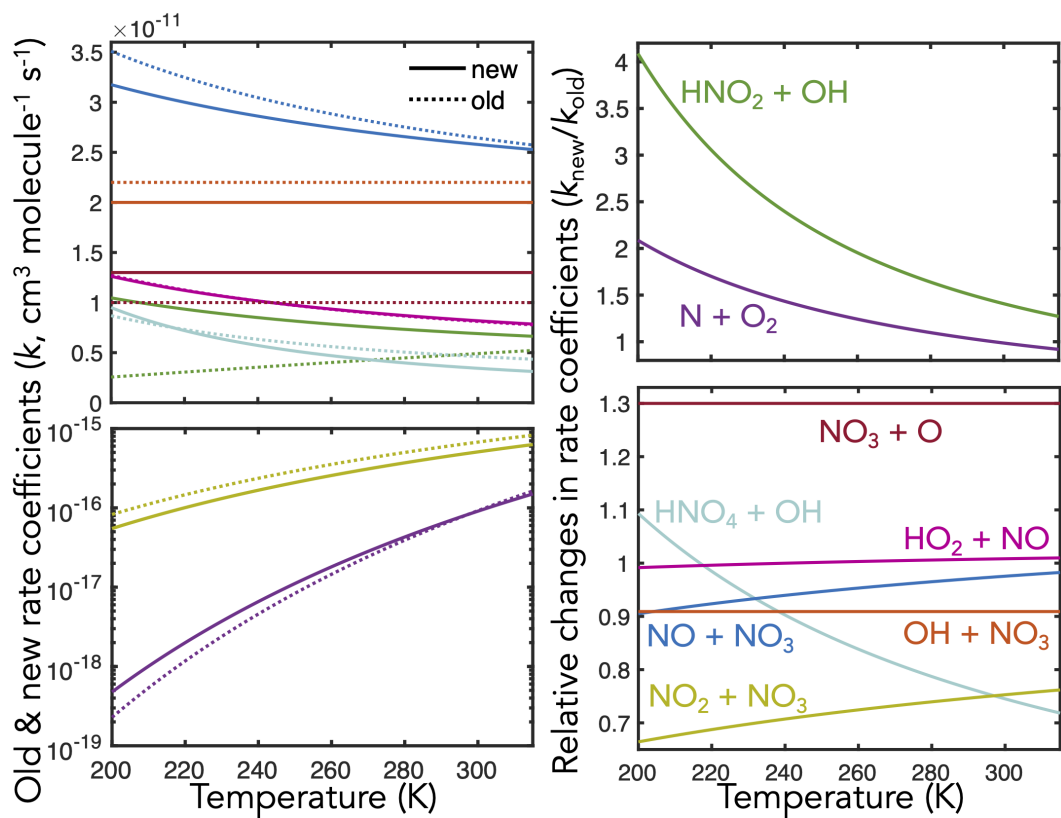

**Figure S2.** Base and updated rate coefficients (left) and relative difference (right) for temperature-dependent reactions in the  $\text{NO}_y$  family as functions of temperature. Reactions are separated onto different scales in the top and bottom panels to better show their ranges.

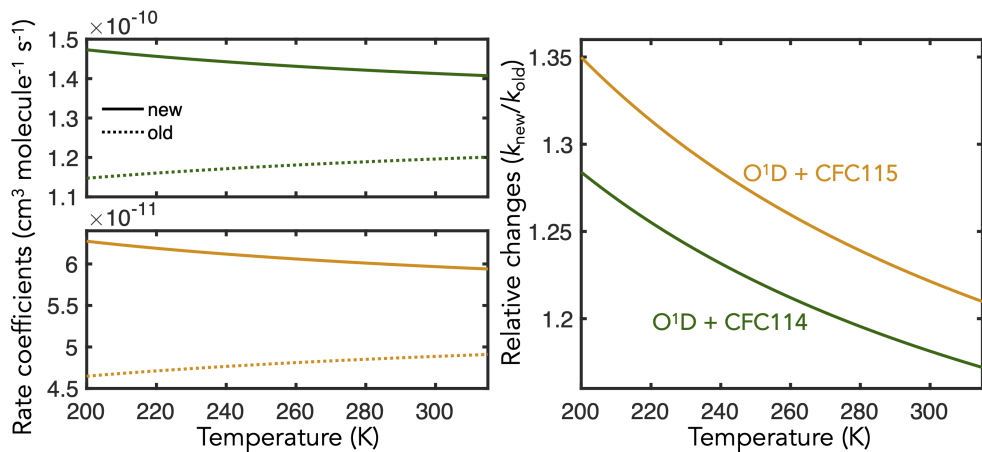

**Figure S3.** Base and updated rate coefficients (left) and relative difference (right) for reactions of  $\text{O}^1\text{D}$  as functions of temperature. Reactions are separated onto different scales in the top and bottom panels to better show their ranges.

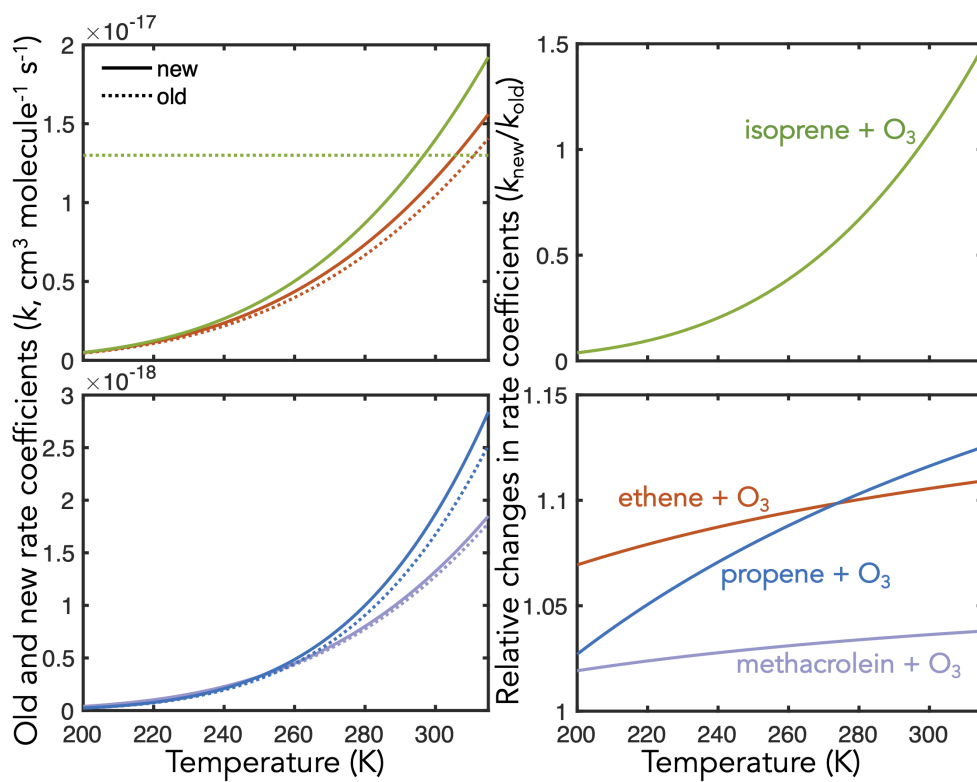

**Figure S4.** Base and updated rate coefficients (left) and relative difference (right) for organic ozonolysis reactions as functions of temperature. Reactions are separated onto different scales in the top and bottom panels to better show their ranges.

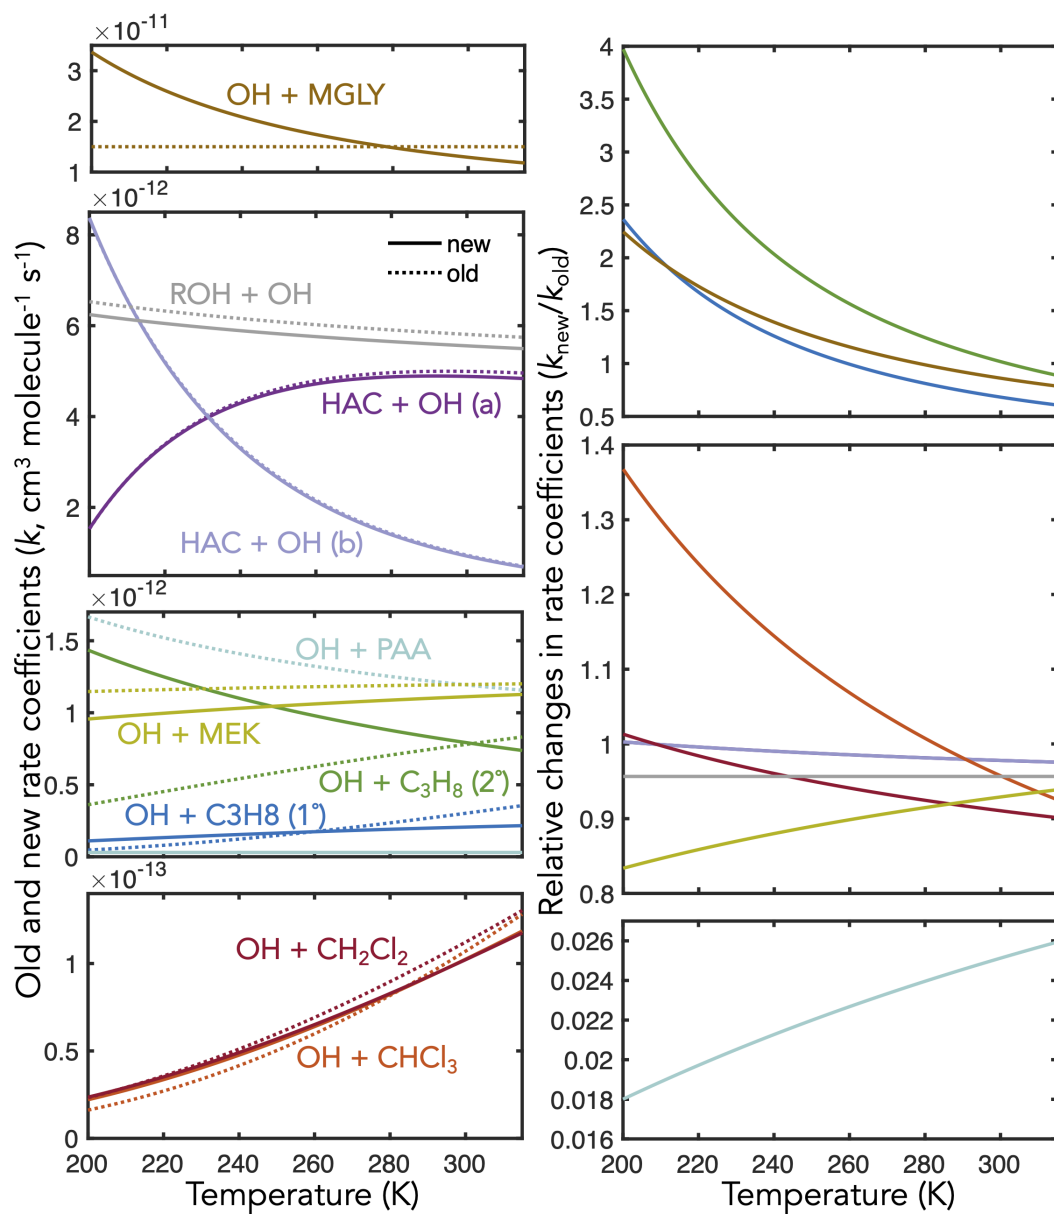

**Figure S5.** Base and updated rate coefficients (left) and relative difference (right) for reactions of OH with organics as functions of temperature. Reactions are separated onto different scales across vertical panels to better show their ranges. MGLY = methylglyoxal, ROH =  $C_{3+}$  alcohols, HAC = hydroxyacetone (parenthetical a and b refer to the two abstraction pathways, where a leads to methylglyoxal and b to fragmentation; note that their relative differences overlap), PAA = peroxyacetic acid, MEK = methyl ethyl ketone, and the parenthetical 1 and 2 after  $C_3H_8$  refer to the primary and secondary abstraction pathways.



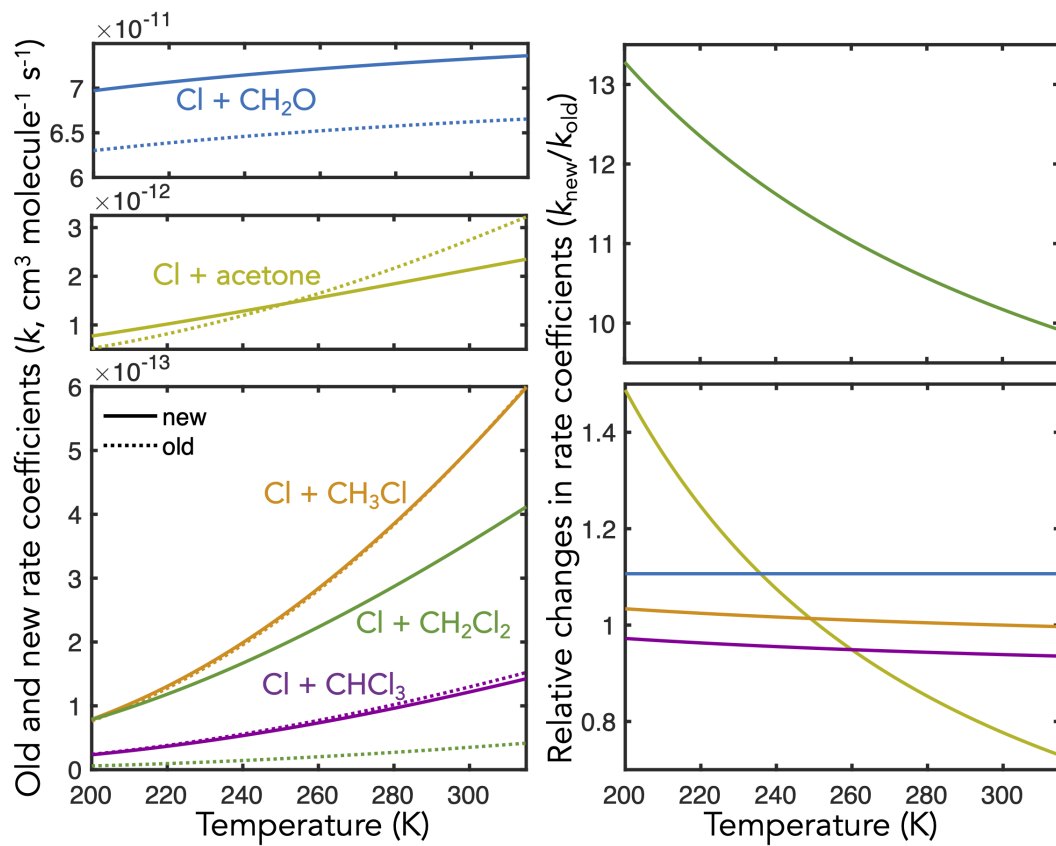

**Figure S6.** Base and updated rate coefficients (left) and relative difference (right) for reactions of Cl radicals with organics as functions of temperature. Reactions are separated onto different scales across vertical panels to better show their ranges.

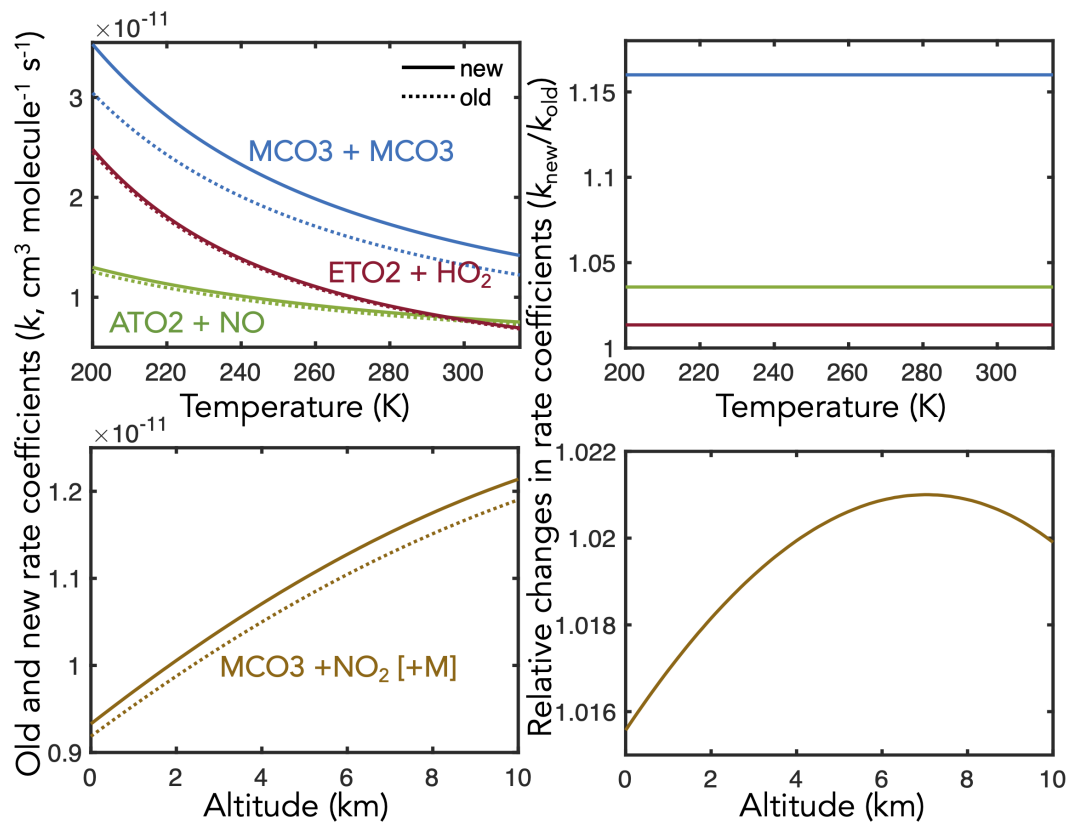

**Figure S7.** Base and updated rate coefficients (left) and relative difference (right) for reactions of peroxy radicals as functions of temperature (top) and, for termolecular reactions, altitude (bottom, where variation of temperature and pressure with altitude is shown in Figure S10).  $\text{MCO}_3$  = peroxyacetyl radical,  $\text{ETO}_2$  = ethylperoxy radical,  $\text{ATO}_2$  = peroxy radical from acetone + OH.

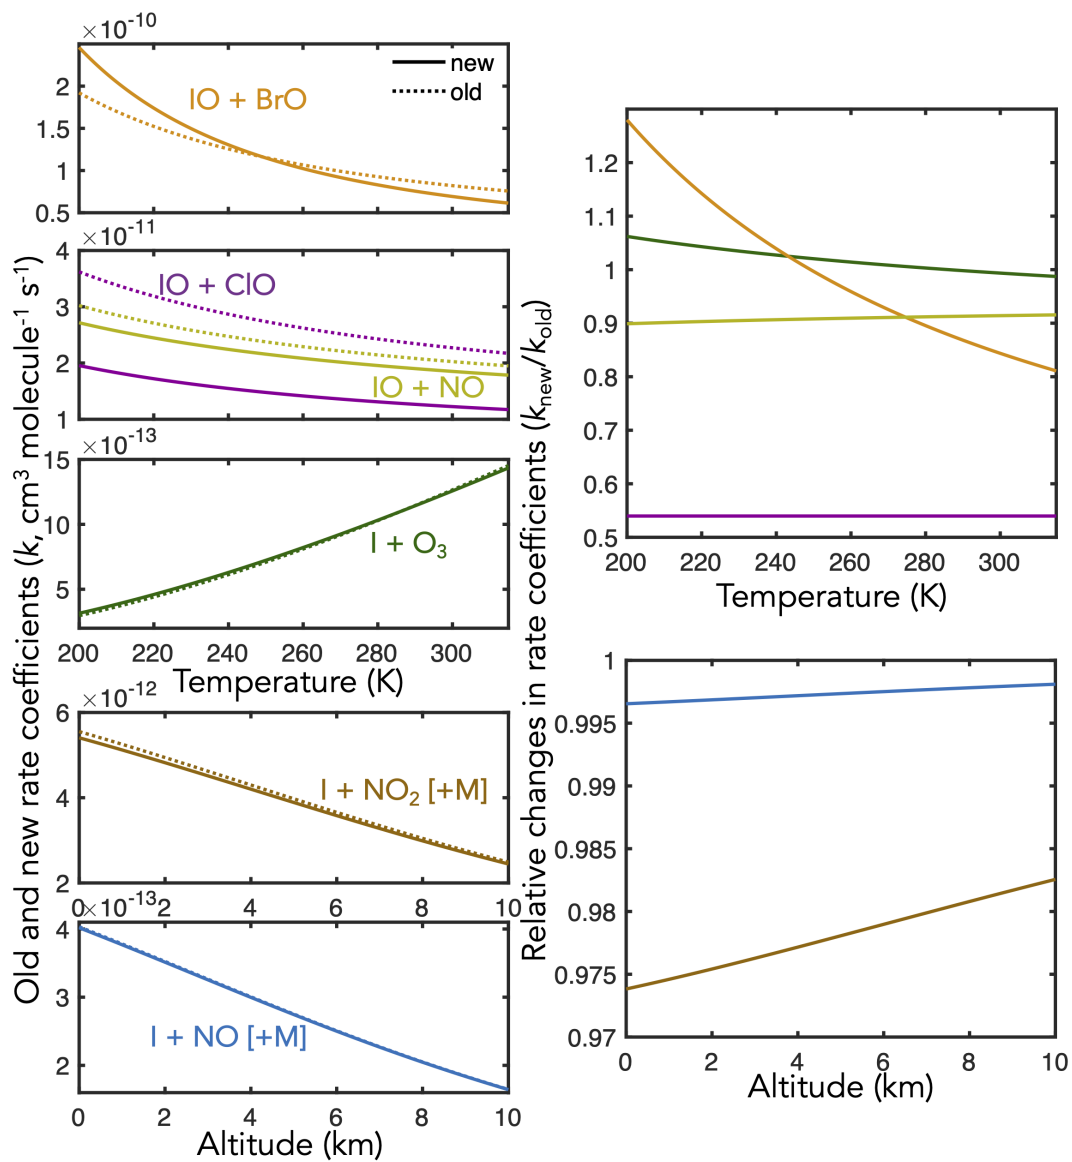

**Figure S8.** Base and updated rate coefficients (left) and relative difference (right) for reactions of iodine species as functions of temperature (top) and, for termolecular reactions, altitude (bottom, where variation of temperature and pressure with altitude is shown in Figure S10).

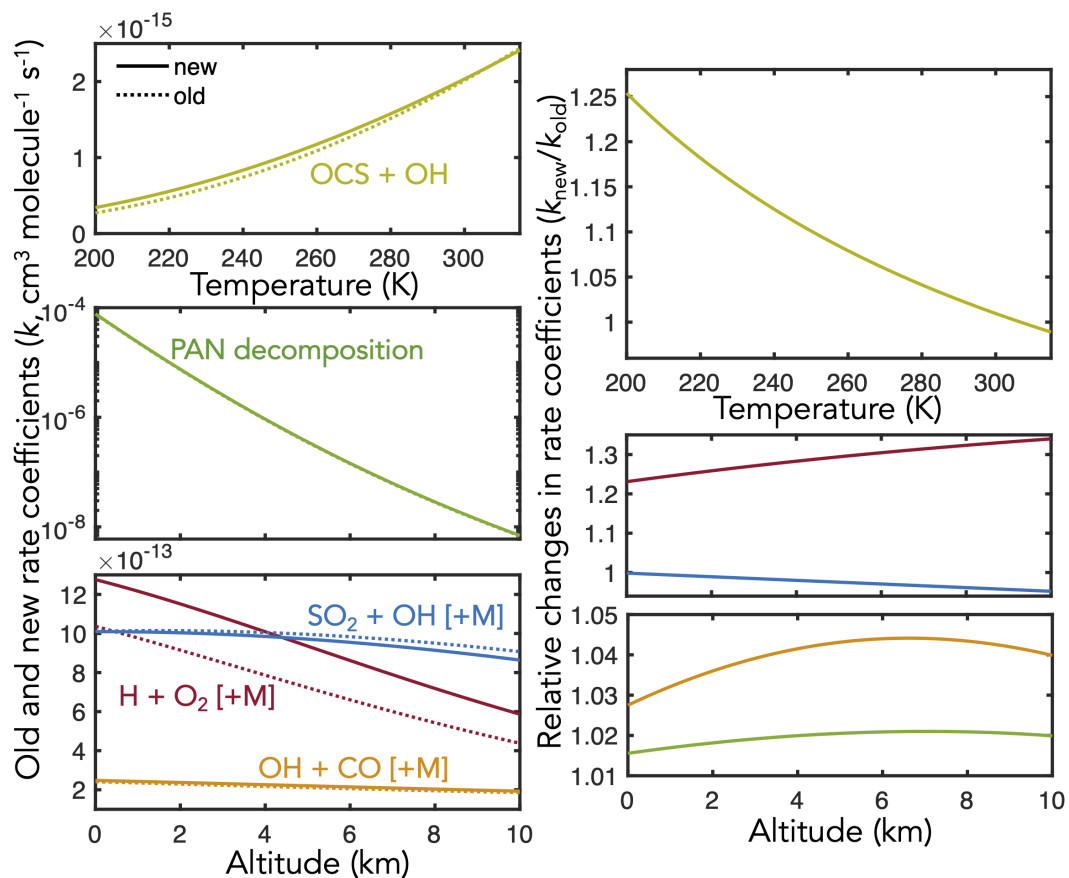

**Figure S9.** Base and updated rate coefficients (left) and relative difference (right) for reactions of species not in earlier categories as functions of temperature (top) and, for termolecular or decomposition reactions, altitude (bottom, where variation of temperature and pressure with altitude is shown in Figure S10).

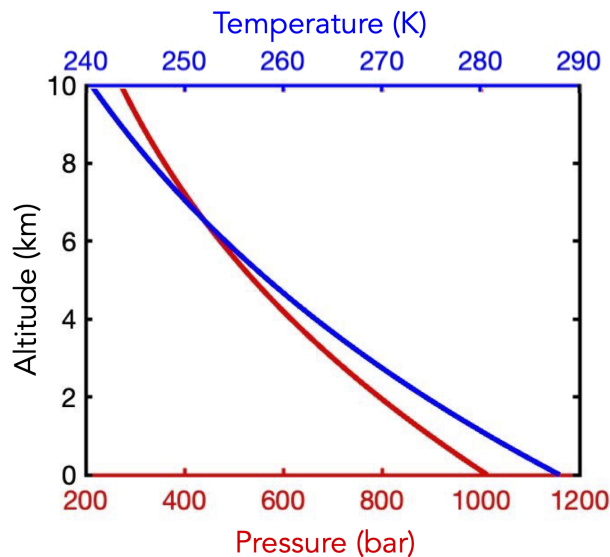

**Figure S10.** Parameterizations of pressure and temperature as functions of altitude for the purposes of computing rate coefficients in Figures S1 and S7-S9.

#### 50 **S4 GEOS-Chem updates not included in Table 1**

Tables S2-S4 list existing and updated GEOS-Chem reactions mentioned in the main text but not included in Table 1. Table S2 shows the 63 reactions updated in this work to improve the balance of carbon and nitrogen between reactants and products. Table S3 shows the the 54 reactions that remain C/N imbalanced in GEOS-Chem. Both include the number of carbons or nitrogens lost or gained in the reaction, as well as the reactants and products (from the base and updated mechanism, in the case of Table 2). Table S4 shows the 23 reactions that have been simplified in this work by combining multiple branching pathways previously represented as separate reactions into a single reaction. In all three tables, lists of reaction products may be truncated for space, but any products with changed branching ratios between the old and new mechanisms are always included.

Table S2: GEOS-Chem reactions updated to improve carbon and nitrogen balance<sup>a</sup>

| Reactants             | Products (base mechanism)                                                                               | C [N] imbalance <sup>b</sup> | Updated products                                                                                      |
|-----------------------|---------------------------------------------------------------------------------------------------------|------------------------------|-------------------------------------------------------------------------------------------------------|
| MVKOHOO + NO          | 0.438 MVKN                                                                                              | -2.248 [-0.562]              | MVKN                                                                                                  |
| MCO3 + MCO3           | 2 MO2                                                                                                   | -2.0                         | 2(MO2 + CO <sub>2</sub> )                                                                             |
| RCO3 + MCO3           | MO2 + 0.5 OTHRO2 + 0.27 B3O2 + 0.07 A3O2                                                                | -1.98                        | 2 CO <sub>2</sub> + MO2 + 0.49 OTHRO2 + 0.27 B3O2 + 0.07 A3O2                                         |
| R4N1 + MCO3           | RCHO + ACTA + NO <sub>2</sub>                                                                           | -1.5                         | RCHO + ACTA + NO <sub>2</sub> + 1.5 CO <sub>2</sub>                                                   |
| PIO2 + MCO3           | MEK + RCHO + RCOOH + ...                                                                                | -1.5                         | 1.125 MEK + RCHO + RCOOH + CO <sub>2</sub> + ...                                                      |
| R4P + hv              | OH + HO <sub>2</sub> + RCHO                                                                             | -1.5                         | OH + HO <sub>2</sub> + 1.5 RCHO                                                                       |
| R4O2 + MCO3           | 0.32(ACET + ALD2) + 0.13 RCHO + ...                                                                     | -1.42                        | 0.32(ACET + ALD2) + 0.29 RCHO + 0.94 CO <sub>2</sub> + ...                                            |
| ICPDH + hv            | 0.438(HAC + GLYX) + 0.122(MCRDH + CO) +<br>0.133(MVKHCB + CH <sub>2</sub> O) + 0.118(GLYC + MGLY) + ... | -1.26                        | 0.586(HAC + GLYX) + 0.163(MCRDH + CO) +<br>0.1(MVKHCB + CH <sub>2</sub> O) + 0.088(GLYC + MGLY) + ... |
| R4P + OH              | 0.791 OH + 0.791 RCHO + 0.209 R4O2                                                                      | -1.1865                      | 0.791 OH + 1.185 RCHO + 0.210 R4O2                                                                    |
| INO2B + MCO3          | CH <sub>2</sub> O + NO <sub>2</sub> + MO2 + 0.903 MVK + 0.097 MACR                                      | -1.0                         | CH <sub>2</sub> O + NO <sub>2</sub> + MO2 + CO <sub>2</sub> + 0.903 MVK + 0.097 MACR                  |
| MVKHCB + OH           | OH + MGLY                                                                                               | -1.0                         | OH + MGLY + CO                                                                                        |
| HMML + OH             | 0.7(MGLY + OH) + 0.3(MCO3 + HCOOH)                                                                      | -1.0                         | 0.7(MGLY + OH) + 0.3(MCO3 + HCOOH) + CO                                                               |
| MAP + HV              | OH + MO2                                                                                                | -1.0                         | OH + MO2 + CO <sub>2</sub>                                                                            |
| RP + HV               | OH + HO <sub>2</sub> + ALD2                                                                             | -1.0                         | OH + HO <sub>2</sub> + ALD2 + CO <sub>2</sub>                                                         |
| AROMRO2 + MCO3        | MO2 + HO <sub>2</sub>                                                                                   | -1.0                         | MO2 + HO <sub>2</sub> + CO <sub>2</sub>                                                               |
| INO2D + MCO3          | MO2 + 0.841 INA + 0.159(HO <sub>2</sub> + ICN)                                                          | -1.0                         | MO2 + 0.841 INA + CO <sub>2</sub> + 0.159(HO <sub>2</sub> + ICN)                                      |
| MGLY                  | SOAGX                                                                                                   | -1.0                         | 1.5 SOAGX                                                                                             |
| MCO3 + OTHRO2         | MO2 + HO <sub>2</sub> + ALD2                                                                            | -1.0                         | MO2 + HO <sub>2</sub> + ALD2 + CO <sub>2</sub>                                                        |
| MCO3 + A3O2           | MO2 + HO <sub>2</sub> + RCHO                                                                            | -1.0                         | MO2 + HO <sub>2</sub> + RCHO + CO <sub>2</sub>                                                        |
| MCO3 + ETO2           | MO2 + HO <sub>2</sub> + ALD2                                                                            | -1.0                         | MO2 + HO <sub>2</sub> + ALD2 + CO <sub>2</sub>                                                        |
| PYAC                  | SOAGX                                                                                                   | -1.0                         | 1.5 SOAGX                                                                                             |
| CH2OO + CO            | CH <sub>2</sub> O                                                                                       | -1.0                         | CH <sub>2</sub> O + CO <sub>2</sub>                                                                   |
| PRN1 + MCO3           | MO2 + ALD2 + CH <sub>2</sub> O + NO <sub>2</sub>                                                        | -1.0                         | MO2 + ALD2 + CH <sub>2</sub> O + NO <sub>2</sub> + CO <sub>2</sub>                                    |
| B3O2 + MCO3           | MO2 + HO <sub>2</sub> + ACET                                                                            | -1.0                         | MO2 + HO <sub>2</sub> + ACET + CO <sub>2</sub>                                                        |
| KO2 + MCO3            | MO2 + MCO3 + ALD2                                                                                       | -1.0                         | MO2 + MCO <sub>3</sub> + ALD2 + CO <sub>2</sub>                                                       |
| CH3CHOO + CO          | ALD2                                                                                                    | -1.0                         | ALD2 + CO <sub>2</sub>                                                                                |
| MCO3 + MO2            | CH <sub>2</sub> O + MO2 + HO <sub>2</sub>                                                               | -1.0                         | CH <sub>2</sub> O + MO2 + HO <sub>2</sub> + CO <sub>2</sub>                                           |
| OLNN + MCO3           | MO2 + HO <sub>2</sub> + ...                                                                             | -1.0                         | MO2 + HO <sub>2</sub> + CO <sub>2</sub> + ...                                                         |
| MCO3 + PO2            | MO2 + ALD2 + CH <sub>2</sub> O + HO <sub>2</sub>                                                        | -1.0                         | MO2 + ALD2 + CH <sub>2</sub> O + HO <sub>2</sub> + CO <sub>2</sub>                                    |
| ATO2 + MCO3           | MO2 + MCO3 + CH <sub>2</sub> O                                                                          | -1.0                         | MO2 + MCO <sub>3</sub> + CH <sub>2</sub> O + CO <sub>2</sub>                                          |
| RCO3 + MO2            | CH <sub>2</sub> O + HO <sub>2</sub> + 0.5 OTHRO2 + ...                                                  | -0.98                        | CH <sub>2</sub> O + CO <sub>2</sub> + HO <sub>2</sub> + 0.49 OTHRO2 + ...                             |
| RCO3 + NO             | NO <sub>2</sub> + 0.5 OTHRO2 + 0.27 B3O2 + 0.07 A3O2                                                    | -0.98                        | NO <sub>2</sub> + CO <sub>2</sub> + 0.49 OTHRO2 + 0.27 B3O2 + 0.07 A3O2                               |
| KO2 + HO <sub>2</sub> | 0.85 ATOOH + 0.15(MCO3 + ALD2 + OH)                                                                     | -0.85                        | 0.85(ATOOH + MO2) + 0.15(MCO3 + ALD2 + OH)                                                            |
| R4O2 + MO2            | 0.75 CH <sub>2</sub> O + 0.25(CH <sub>3</sub> OH + ROH) + 0.07 RCHO + ...                               | -0.57                        | CH <sub>2</sub> O + 0.38 ROH + 0.25 CH <sub>3</sub> OH + 0.13 RCHO + ...                              |
| R4N1 + MCO3           | MO2 + NO <sub>2</sub> + 0.75 ALD2 + 0.57 RCHO + ...                                                     | -0.55                        | MO2 + NO <sub>2</sub> + 0.75 ALD2 + 0.57 RCHO + 0.55 CO <sub>2</sub> + ...                            |

Continued on next page

Continued from previous page

| Reactants               | Products (base mechanism)                                                                                              | C [N] imbalance <sup>b</sup> | Updated products                                                                                                   |
|-------------------------|------------------------------------------------------------------------------------------------------------------------|------------------------------|--------------------------------------------------------------------------------------------------------------------|
| R4O2 + MCO3             | MEK + ACTA                                                                                                             | -0.5                         | MEK + ACTA + 0.5 CO <sub>2</sub>                                                                                   |
| R4N1 + NO               | 2 NO <sub>2</sub> + 0.86 ALD2 + 0.57(RCHO + CH <sub>2</sub> O)                                                         | -0.5                         | 2 NO <sub>2</sub> + 0.97 ALD2 + 0.64(RCHO + CH <sub>2</sub> O)                                                     |
| R4N1 + MO2              | 0.95 CH <sub>2</sub> O + 0.54 RCHO + 0.38 ALD2 + 0.25 ROH + ...                                                        | -0.495                       | 0.95 CH <sub>2</sub> O + 0.58 RCHO + 0.38 ALD2 + 0.375 ROH + ...                                                   |
| RCO3 + HO <sub>2</sub>  | 0.41 RP + 0.22 OTHRO2 + 0.15 RCOOH + ...                                                                               | -0.43                        | 0.43 CO <sub>2</sub> + 0.41 RP + 0.22 OTHRO2 + 0.15 RCOOH + ...                                                    |
| ATO2 + MO2              | 0.5(MGLY + CH <sub>3</sub> OH + CH <sub>2</sub> O) + 0.3 MCO3 + ...                                                    | -0.3                         | 0.5(MGLY + CH <sub>3</sub> OH + CH <sub>2</sub> O) + 0.3(MCO3 + CO <sub>2</sub> ) + ...                            |
| PAN + hv                | 0.7(MCO3 + NO <sub>2</sub> ) + 0.3(MO2 + NO <sub>3</sub> )                                                             | -0.3                         | 0.7(MCO3 + NO <sub>2</sub> ) + 0.3(MO2 + NO <sub>3</sub> + CO <sub>2</sub> )                                       |
| KO2 + MO2               | 0.75 CH <sub>2</sub> O + 0.5(ALD2 + MCO3) + ...                                                                        | -0.25                        | 0.75 CH <sub>2</sub> O + 0.5(ALD2 + MCO3) + 0.25 MO2 + ...                                                         |
| R4N2 + hv               | NO <sub>2</sub> + 0.32(ACET + ALD2 + OTHRO2) + 0.27 HO <sub>2</sub> +<br>0.19 MEK + 0.18(MO2 + B3O2) + 0.13 RCHO + ... | -0.24                        | NO <sub>2</sub> + 0.34(ACET + ALD2 + OTHRO2) + 0.27 HO <sub>2</sub> +<br>0.19 (MEK + MO2 + B3O2) + 0.15 RCHO + ... |
| R4O2 + NO               | NO <sub>2</sub> + 0.32(ACET + ALD2 + OTHRO2) + 0.27 HO <sub>2</sub> +<br>0.19(MEK + MO2) + 0.18 B3O2 + 0.14 RCHO + ... | -0.2                         | NO <sub>2</sub> + 0.34(ACET + ALD2 + OTHRO2) + 0.27 HO <sub>2</sub> +<br>0.19 (MEK + MO2 + B3O2) + 0.15 RCHO + ... |
| PRPE + O <sub>3</sub>   | 0.56 CO + 0.5 ALD2 + 0.12 CH <sub>2</sub> OO + ...                                                                     | -0.2                         | 0.56 CO + 0.5 ALD2 + 0.22 CH <sub>2</sub> OO + 0.1 CO <sub>2</sub> + ...                                           |
| MVK + O <sub>3</sub>    | 0.6 CH <sub>2</sub> O + 0.545 MGLY + 0.5 CH <sub>2</sub> OO + 0.18 CO + ...                                            | -0.1                         | 0.6 CH <sub>2</sub> O + 0.545 MGLY + 0.5 CH <sub>2</sub> OO + 0.28 CO + ...                                        |
| ICNOO + NO              | 0.33(CO <sub>2</sub> + HO <sub>2</sub> + CO) + 0.231 PROPNN + ...                                                      | -0.099                       | 0.429 CO <sub>2</sub> + 0.33(HO <sub>2</sub> + CO) + 0.231 PROPNN + ...                                            |
| ICNOO + HO <sub>2</sub> | 0.33(CO <sub>2</sub> + HO <sub>2</sub> + CO) + 0.231 PROPNN + ...                                                      | -0.099                       | 0.429 CO <sub>2</sub> + 0.33(HO <sub>2</sub> + CO) + 0.231 PROPNN + ...                                            |
| INO2D + INO2D           | 0.861 ICN + 0.671 IHN1 + 0.34 INA + ...                                                                                | -0.005 [-0.001]              | 0.862 ICN + 0.671 IHN1 + 0.34 INA + ...                                                                            |
| HPALD2 + hv             | 1.637 OH + 0.818 CO + 0.455 MCRENOL + ...                                                                              | +0.004                       | 1.637 OH + 0.818 CO + 0.454 MCRENOL + ...                                                                          |
| MACR1OOH + OH           | 0.488(HAC + CO) + 0.415 CO <sub>2</sub> + 0.165 MACR1OO + ...                                                          | +0.005                       | 0.488(HAC + CO) + 0.41 CO <sub>2</sub> + 0.165 MACR1OO + ...                                                       |
| RCHO + hv               | CO + HO <sub>2</sub> + 0.5 OTHRO2 + 0.27 B3O2 + 0.07 A3O2                                                              | +0.02                        | CO + HO <sub>2</sub> + 0.49 OTHRO2 + 0.27 B3O2 + 0.07 A3O2                                                         |
| MEK + hv                | 0.85 MCO3 + 0.425 OTHRO2 + 0.23 B3O2 + ...                                                                             | +0.02                        | 0.85 MCO3 + 0.415 OTHRO2 + 0.23 B3O2 + ...                                                                         |
| KO2 + NO                | 0.93(NO <sub>2</sub> + ALD2 + MCO3) + 0.07 R4N2                                                                        | +0.035                       | 0.928 NO <sub>2</sub> + 0.919(ALD2 + MCO3) + 0.072 R4N2                                                            |
| AROMP4 + OH             | 0.6 GLYX + 0.45 RCOOH + 0.25 (CO + HCOOH) + ...                                                                        | +0.04                        | 0.6 GLYX + 0.43 RCOOH + 0.26 (CO + HCOOH) + ...                                                                    |
| BENZ + OH               | 0.56 AROMP4 + 0.54 PHEN + 0.2 CO + 0.18 GLYX + ...                                                                     | +0.04                        | 0.55 AROMP4 + 0.54 PHEN + 0.2 CO + 0.18 GLYX + ...                                                                 |
| IDN + hv                | 0.5(GLYC + HAC) + 0.228 ICN + 0.227 INA + ...                                                                          | +0.05 [+0.01]                | 0.5(GLYC + HAC) + 0.223 ICN + 0.222 INA + ...                                                                      |
| ITHN + OH               | 0.92 ITCN + 0.62 HO <sub>2</sub> + 0.3 OH + ...                                                                        | +0.1 [+0.02]                 | 0.90 ITCN + 0.62 HO <sub>2</sub> + 0.3 OH + ...                                                                    |
| AROMP5                  | 1.2 RCHO + 0.2(R4O2 + MGLY + HO <sub>2</sub> )                                                                         | +0.1                         | 1.15 RCHO + 0.2(R4O2 + MGLY + HO <sub>2</sub> ) + 0.05 CO                                                          |
| OLND + MO2              | 0.965 CH <sub>2</sub> O + 0.930 RCHO + 0.348 MEK + ...                                                                 | +0.147                       | 0.85 CH <sub>2</sub> O + 0.930 RCHO + 0.34 MEK + ...                                                               |
| NPHEN + OH              | AROMP4 + 0.5 R4N1 + 0.5 NO <sub>2</sub>                                                                                | +0.25                        | 0.9 AROMP4 + 0.5 R4N1 + 0.15 CO + 0.5 NO <sub>2</sub>                                                              |
| NPHEN + NO <sub>3</sub> | AROMP4 + NO <sub>2</sub> + 0.5(R4N1 + HNO <sub>3</sub> )                                                               | +0.25                        | NO <sub>2</sub> + 0.9 AROMP4 + 0.5(R4N1 + HNO <sub>3</sub> ) + 0.15 CO                                             |
| HMML                    | SOAIE                                                                                                                  | +1.0                         | 0.8 SOAIE                                                                                                          |

<sup>a</sup>See Table S1 for species names; <sup>b</sup>Defined as number of carbons [nitrogens in brackets] in products minus number in reactants in base mechanism (all reactions in this table are balanced in the updated mechanism).

Table S3: GEOS-Chem reactions that remain imbalanced in carbon or nitrogen<sup>a</sup>

| C [N] imbalance <sup>b</sup> | Reactants                | Products (base mechanism)                                                                                                             |
|------------------------------|--------------------------|---------------------------------------------------------------------------------------------------------------------------------------|
| -7.807                       | LIMO2 + MCO3             | 0.5(RCOOH + MO2 + HO2) + 0.385 CH2O + 0.308 MACR + 0.192 PRPE                                                                         |
| -7.152                       | LIMO2 + MO2              | 1.04 CH2O + HO2 + 0.308 MACR + 0.25(ROH + CH3OH) + 0.192 PRPE                                                                         |
| -7.0                         | HONIT + hv               | HAC + NO2                                                                                                                             |
| -7.0                         | HONIT + OH               | HAC + NO3                                                                                                                             |
| -7.0                         | MONITU + hv              | RCHO + NO2                                                                                                                            |
| -7.0                         | PIP + hv                 | RCHO + OH + HO2                                                                                                                       |
| -6.14                        | PIP + OH                 | 0.49 OH + 0.44 R4O2 + 0.41 MEK + 0.08 RCHO                                                                                            |
| -6.0                         | MONITS + hv              | MEK + NO2                                                                                                                             |
| -6.0                         | LIMO2 + NO3              | HO2 + NO2 + 0.615 MACR + 0.385(PRPE + CH2O)                                                                                           |
| -4.726                       | OLND + OLND              | 1.21 RCHO + NO2 + 0.7 MONITS + 0.504 CH2O + 0.3 MONITU + 0.285 MEK                                                                    |
| -4.52                        | PIO2 + NO                | 0.82(HO2 + NO2) + 0.44 MEK + 0.43 RCHO + 0.23 CH2O + ...<br>0.12 MONITS + 0.11 ACET + 0.07 HCOOH + 0.06 MONITU                        |
| -4.137                       | OLND + NO3               | 2 NO2 + 1.24 RCHO + 0.464 MEK + 0.287 CH2O                                                                                            |
| -4.137                       | OLND + MCO3              | NO2 + 1.24 RCHO + 0.5(RCOOH + MO2) + 0.464 MEK + 0.287 CH2O                                                                           |
| -4.137                       | OLND + NO                | 2 NO2 + 1.24 RCHO + 0.464 MEK + 0.287 CH2O                                                                                            |
| -4.0                         | PIO2 + MO2               | HO2 + 0.75(RCHO + MEK + CH2O) + 0.25(ROH + CH3OH)                                                                                     |
| -3.899                       | LIMO2 + NO               | 0.78 NO2 + 0.686 HO2 + 0.491 RCHO + 0.289(PRPE + ...<br>MEK) + 0.231 CH2O + 0.22 MONITU + 0.058 HAC                                   |
| -3.31                        | MTPO + O3                | 0.85 OH + 0.65 RCHO + 0.62 KO2 + 0.53 MEK + 0.14 CO + 0.1 HO2 + 0.02 H2O2                                                             |
| -3.31                        | MTPA + O3                | 0.85 OH + 0.65 RCHO + 0.62 KO2 + 0.53 MEK + 0.14 CO + 0.1 HO2 + 0.02 H2O2                                                             |
| -3.06                        | LIMO + O3                | 0.85 OH + 0.79 MACR + 0.46 PRPE + 0.42 KO2 + 0.16 OTHRO2 + 0.14 CO + ...<br>0.1 HO2 + 0.07 RCOOH + 0.04 CH2O + 0.02 H2O2 + 0.01 HCOOH |
| -3.0                         | PIO2 + NO3               | HO2 + NO2 + RCHO + MEK                                                                                                                |
| -2.282                       | OLNN + OLND              | 1.05 MONITS + 0.64 RCHO + 0.5(HO2 + NO2) + 0.45 MONITU + 0.202 CH2O + 0.149 MEK                                                       |
| -2.0                         | OH + CH2CCl3             | 3 Cl + H2O                                                                                                                            |
| -2.0                         | H2402 + hv               | 2 Br                                                                                                                                  |
| -2.0                         | CH3CCl3 + hv             | 3 Cl                                                                                                                                  |
| -1.5                         | O <sup>1</sup> D + H2402 | 0.75(Br + BrO) + 0.25(H2402 + O)                                                                                                      |
| [-1.0]                       | MONITU + NO3             | HONIT                                                                                                                                 |
| [-1.0]                       | MONITS + NO3             | HONIT                                                                                                                                 |
| [-1.0]                       | IDN                      | IONITA                                                                                                                                |
| -1.0                         | CH2ICl + hv              | I + Cl                                                                                                                                |
| -1.0                         | CH2I2 + hv               | 2 I                                                                                                                                   |
| -1.0                         | CH3I + hv                | I                                                                                                                                     |
| -1.0                         | H1211 + hv               | Cl + Br                                                                                                                               |
| -1.0                         | H1301 + hv               | Br                                                                                                                                    |
| -1.0                         | CCl4 + hv                | 4 Cl                                                                                                                                  |
| -1.0                         | CH2Cl2 + hv              | 2 Cl                                                                                                                                  |
| -1.0                         | CH2Br2 + hv              | 2 Br                                                                                                                                  |
| -1.0                         | CHBr3 + hv               | 3 Br                                                                                                                                  |
| -1.0                         | CH2IBr + hv              | I + Br                                                                                                                                |
| -1.0                         | OH + CH2Br2              | 2 Br                                                                                                                                  |

Continued on next page



Continued from previous page

| C [N] imbalance <sup>b</sup> | Reactants                                          | Products (base mechanism)                                                       |
|------------------------------|----------------------------------------------------|---------------------------------------------------------------------------------|
| -1.0                         | OH + CHCl <sub>3</sub>                             | 3 Cl + HO <sub>2</sub>                                                          |
| -1.0                         | OH + CH <sub>2</sub> Cl <sub>2</sub>               | 2 Cl + HO <sub>2</sub>                                                          |
| -1.0                         | OH + CH <sub>3</sub> Cl                            | Cl + HO <sub>2</sub> + H <sub>2</sub> O                                         |
| -1.0                         | OH + CH <sub>3</sub> Br                            | Br + HO <sub>2</sub> + H <sub>2</sub> O                                         |
| -1.0                         | OH + CHBr <sub>3</sub>                             | 3 Br                                                                            |
| -0.95                        | O <sup>1</sup> D + CH <sub>2</sub> Br <sub>2</sub> | 0.95(Br + BrO) + 0.05(CH <sub>2</sub> Br <sub>2</sub> + O)                      |
| -0.86                        | O <sup>1</sup> D + CCl <sub>4</sub>                | 2.58 Cl + 0.86 ClO + 0.14(CCl <sub>4</sub> + O)                                 |
| -0.75                        | (CH <sub>3</sub> ) <sub>2</sub> S + OH             | MO <sub>2</sub> + 0.75 SO <sub>2</sub> + 0.25 CH <sub>3</sub> SO <sub>3</sub> H |
| -0.68                        | O <sup>1</sup> D + CHBr <sub>3</sub>               | 1.36 Br + 0.68 BrO + 0.32(O + CHBr <sub>3</sub> )                               |
| -0.64                        | O <sup>1</sup> D + H1211                           | 0.36(O + H1211) + 0.33(Br + ClO) + 0.31(BrO + Cl)                               |
| -0.41                        | O <sup>1</sup> D + H1301                           | 0.59(O + H1301) + 0.41 BrO                                                      |
| +0.5                         | R4N2                                               | IONITA                                                                          |
| +1.0                         | MCRHN                                              | IONITA                                                                          |
| +1.0                         | MCRHNB                                             | IONITA                                                                          |
| +1.0                         | MVKN                                               | IONITA                                                                          |

<sup>a</sup>See Table S1 for species names; <sup>b</sup>Defined as number of carbons [nitrogens in brackets] in products minus number in reactants.

Table S4: GEOS-Chem reactions simplified by consolidating multiple branching pathways<sup>a</sup>

| Reactants                               | Old reactions                                                                                                                             |                                         | Updated reaction                                                                                                                                             |                                          |
|-----------------------------------------|-------------------------------------------------------------------------------------------------------------------------------------------|-----------------------------------------|--------------------------------------------------------------------------------------------------------------------------------------------------------------|------------------------------------------|
|                                         | Products                                                                                                                                  | Rate coefficient <sup>b</sup>           | Products                                                                                                                                                     | Rate coefficient <sup>b</sup>            |
| O <sup>1</sup> D + O <sub>3</sub>       | 2 O <sub>2</sub>                                                                                                                          | $1.2 \times 10^{-10}$                   | 1.5 O <sub>2</sub> + O                                                                                                                                       | $2.4 \times 10^{-10}$                    |
|                                         | 2 O + O <sub>2</sub>                                                                                                                      | $1.2 \times 10^{-10}$                   |                                                                                                                                                              |                                          |
| O <sup>1</sup> D + N <sub>2</sub> O     | N <sub>2</sub> + O <sub>2</sub>                                                                                                           | $4.63 \times 10^{-11} \times e^{20/T}$  | 1.22 NO + 0.39(O <sub>2</sub> + N <sub>2</sub> )                                                                                                             | $1.19 \times 10^{-10} \times e^{20/T}$   |
|                                         | 2 NO                                                                                                                                      | $7.25 \times 10^{-11} \times e^{20/T}$  |                                                                                                                                                              |                                          |
| O <sup>1</sup> D + CH <sub>4</sub>      | MO <sub>2</sub> + OH                                                                                                                      | $1.31 \times 10^{-10}$                  | 0.75(MO <sub>2</sub> + OH) + 0.25 CH <sub>2</sub> O + 0.2(H + HO <sub>2</sub> ) + 0.05 H <sub>2</sub>                                                        | $1.75 \times 10^{-10}$                   |
|                                         | CH <sub>2</sub> O + H + HO <sub>2</sub>                                                                                                   | $3.5 \times 10^{-11}$                   |                                                                                                                                                              |                                          |
|                                         | CH <sub>2</sub> O + H <sub>2</sub>                                                                                                        | $9.0 \times 10^{-12}$                   |                                                                                                                                                              |                                          |
| H + HO <sub>2</sub>                     | 2 OH                                                                                                                                      | $7.2 \times 10^{-11}$                   | 1.788 OH + 0.086(H <sub>2</sub> + O <sub>2</sub> ) + 0.02(H <sub>2</sub> O + O)                                                                              | $8.05 \times 10^{-11}$                   |
|                                         | H <sub>2</sub> + O <sub>2</sub>                                                                                                           | $6.9 \times 10^{-12}$                   |                                                                                                                                                              |                                          |
|                                         | O + H <sub>2</sub> O                                                                                                                      | $1.6 \times 10^{-12}$                   |                                                                                                                                                              |                                          |
| ClOO + Cl                               | Cl <sub>2</sub> + O <sub>2</sub>                                                                                                          | $2.3 \times 10^{-10}$                   | 0.95(Cl <sub>2</sub> + O <sub>2</sub> ) + 0.1 ClO                                                                                                            | $2.42 \times 10^{-10}$                   |
|                                         | 2 ClO                                                                                                                                     | $1.2 \times 10^{-11}$                   |                                                                                                                                                              |                                          |
| IO + ClO <sup>c</sup>                   | I + OClO                                                                                                                                  | $5.1 \times 10^{-12} \times e^{280/T}$  | 0.809 I + 0.56 OClO + 0.249 Cl + 0.191 ICl + 0.44 O <sub>2</sub>                                                                                             | $4.82 \times 10^{-12} \times e^{280/T}$  |
|                                         | I + Cl + O <sub>2</sub>                                                                                                                   | $2.81 \times 10^{-12} \times e^{280/T}$ |                                                                                                                                                              |                                          |
|                                         | ICl + O <sub>2</sub>                                                                                                                      | $1.02 \times 10^{-12} \times e^{280/T}$ |                                                                                                                                                              |                                          |
| IO + BrO <sup>c</sup>                   | Br + OIO                                                                                                                                  | $1.2 \times 10^{-11} \times e^{510/T}$  | Br + 0.8 OIO + 0.2(I + O <sub>2</sub> )                                                                                                                      | $5.5 \times 10^{-12} \times e^{760/T}$   |
|                                         | Br + I + O <sub>2</sub>                                                                                                                   | $3.0 \times 10^{-12} \times e^{510/T}$  |                                                                                                                                                              |                                          |
| IO + IO                                 | I + OIO                                                                                                                                   | $6.0 \times 10^{-12} \times e^{500/T}$  | 0.6 I <sub>2</sub> O <sub>2</sub> + 0.4(I + OIO)                                                                                                             | $1.5 \times 10^{-11} \times e^{500/T}$   |
|                                         | I <sub>2</sub> O <sub>2</sub>                                                                                                             | $9.0 \times 10^{-12} \times e^{500/T}$  |                                                                                                                                                              |                                          |
| I <sub>2</sub> O <sub>2</sub> [+M]      | 2 IO [+M]                                                                                                                                 | $1.0 \times 10^{12} \times e^{-9770/T}$ | 0.996(OIO + I) + 0.008 IO [+M]                                                                                                                               | $2.51 \times 10^{14} \times e^{-9770/T}$ |
|                                         | OIO + I [+M]                                                                                                                              | $2.5 \times 10^{14} \times e^{-9770/T}$ |                                                                                                                                                              |                                          |
| CH <sub>3</sub> OOH + OH                | CH <sub>3</sub> OO + H <sub>2</sub> O                                                                                                     | $2.66 \times 10^{-12} \times e^{200/T}$ | H <sub>2</sub> O + 0.7 CH <sub>3</sub> OO + 0.3(CH <sub>2</sub> O + OH)                                                                                      | $3.8 \times 10^{-12} \times e^{200/T}$   |
|                                         | CH <sub>2</sub> O + OH + H <sub>2</sub> O                                                                                                 | $1.14 \times 10^{-12} \times e^{200/T}$ |                                                                                                                                                              |                                          |
| ATO <sub>2</sub> OH + OH                | ATO <sub>2</sub> + H <sub>2</sub> O                                                                                                       | $2.66 \times 10^{12} \times e^{200/T}$  | H <sub>2</sub> O + 0.7 ATO <sub>2</sub> + 0.3(MGLY + OH)                                                                                                     | $3.8 \times 10^{-12} \times e^{200/T}$   |
|                                         | MGLY + OH + H <sub>2</sub> O                                                                                                              | $1.14 \times 10^{-12} \times e^{200/T}$ |                                                                                                                                                              |                                          |
| ETO <sub>2</sub> + ETO <sub>2</sub>     | 2(HO <sub>2</sub> + ALD <sub>2</sub> )                                                                                                    | $4.1 \times 10^{14}$                    | 1.6 ALD <sub>2</sub> + 1.2 HO <sub>2</sub> + 0.4 EOH                                                                                                         | $6.4 \times 10^{-14}$                    |
|                                         | EOH + ALD <sub>2</sub>                                                                                                                    | $2.7 \times 10^{-14}$                   |                                                                                                                                                              |                                          |
| OTHRO <sub>2</sub> + OTHRO <sub>2</sub> | 2(HO <sub>2</sub> + ALD <sub>2</sub> )                                                                                                    | $4.1 \times 10^{14}$                    | 1.6 ALD <sub>2</sub> + 1.2 HO <sub>2</sub> + 0.4 EOH                                                                                                         | $6.4 \times 10^{-14}$                    |
|                                         | EOH + ALD <sub>2</sub>                                                                                                                    | $2.7 \times 10^{-14}$                   |                                                                                                                                                              |                                          |
| RCO <sub>3</sub> + MO <sub>2</sub>      | CH <sub>2</sub> O + HO <sub>2</sub> + 0.5 OTHRO <sub>2</sub><br>+ 0.27 B <sub>3</sub> O <sub>2</sub> + 0.07 A <sub>3</sub> O <sub>2</sub> | $1.68 \times 10^{-12} \times e^{500/T}$ | CH <sub>2</sub> O + 0.9 HO <sub>2</sub> + 0.45 OTHRO <sub>2</sub> +<br>0.243 B <sub>3</sub> O <sub>2</sub> + 0.1 RCOOH + 0.063 A <sub>3</sub> O <sub>2</sub> | $1.87 \times 10^{-12} \times e^{500/T}$  |
|                                         | CH <sub>2</sub> O + RCOOH                                                                                                                 | $1.87 \times 10^{-13} \times e^{500/T}$ |                                                                                                                                                              |                                          |
| MCO <sub>3</sub> + MO <sub>2</sub>      | CH <sub>2</sub> O + MO <sub>2</sub> + HO <sub>2</sub>                                                                                     | $1.8 \times 10^{-12} \times e^{500/T}$  | CH <sub>2</sub> O + 0.9(MO <sub>2</sub> + HO <sub>2</sub> ) + 0.1 ACTA                                                                                       | $2.0 \times 10^{-12} \times e^{500/T}$   |
|                                         | CH <sub>2</sub> O + ACTA                                                                                                                  | $2.0 \times 10^{-13} \times e^{500/T}$  |                                                                                                                                                              |                                          |

Continued on next page

Continued from previous page

| Reactants     | Old reactions                                                                                                                 |                                                                                                | New reaction                                                                                                                      |                                         |
|---------------|-------------------------------------------------------------------------------------------------------------------------------|------------------------------------------------------------------------------------------------|-----------------------------------------------------------------------------------------------------------------------------------|-----------------------------------------|
|               | Products                                                                                                                      | Rate coefficient <sup>b</sup>                                                                  | Products                                                                                                                          | Rate coefficient <sup>b</sup>           |
| MCO3 + ETO2   | ALD2 + MO2 + HO <sub>2</sub>                                                                                                  | $1.68 \times 10^{-12} \times e^{500/T}$                                                        | ALD2 + 0.9(MO2 + HO <sub>2</sub> ) + 0.1 ACTA                                                                                     | $1.87 \times 10^{-12} \times e^{500/T}$ |
|               | ALD2 + ACTA                                                                                                                   | $1.87 \times 10^{-13} \times e^{500/T}$                                                        |                                                                                                                                   |                                         |
| MCO3 + OTHRO2 | ALD2 + MO2 + HO <sub>2</sub>                                                                                                  | $1.68 \times 10^{-12} \times e^{500/T}$                                                        | ALD2 + 0.9(MO2 + HO <sub>2</sub> ) + 0.1 ACTA                                                                                     | $1.87 \times 10^{-12} \times e^{500/T}$ |
|               | ALD2 + ACTA                                                                                                                   | $1.87 \times 10^{-13} \times e^{500/T}$                                                        |                                                                                                                                   |                                         |
| MCO3 + ATO2   | MCO3 + MO2 + CH <sub>2</sub> O                                                                                                | $1.68 \times 10^{-12} \times e^{500/T}$                                                        | 0.9(MCO3 + MO2 + CH <sub>2</sub> O) + 0.1(MGLY + ACTA)                                                                            | $1.87 \times 10^{-12} \times e^{500/T}$ |
|               | MGLY + ACTA                                                                                                                   | $1.87 \times 10^{-13} \times e^{500/T}$                                                        |                                                                                                                                   |                                         |
| MCO3 + KO2    | MCO3 + MO2 + ALD2                                                                                                             | $1.68 \times 10^{-12} \times e^{500/T}$                                                        | 0.9(MCO3 + MO2 + ALD2) + 0.1(MEK + ACTA)                                                                                          | $1.87 \times 10^{-12} \times e^{500/T}$ |
|               | MEK + ACTA                                                                                                                    | $1.87 \times 10^{-13} \times e^{500/T}$                                                        |                                                                                                                                   |                                         |
| MCO3 + PRN1   | CH <sub>2</sub> O + NO <sub>2</sub> + MO2 + ALD2                                                                              | $1.68 \times 10^{-12} \times e^{500/T}$                                                        | NO <sub>2</sub> + 0.9(CH <sub>2</sub> O + MO2 + ALD2) + 0.1(RCHO + ACTA)                                                          | $1.87 \times 10^{-12} \times e^{500/T}$ |
|               | RCHO + NO <sub>2</sub> + ACTA                                                                                                 | $1.87 \times 10^{-13} \times e^{500/T}$                                                        |                                                                                                                                   |                                         |
| MCO3 + A3O2   | RCHO + MO2 + HO <sub>2</sub>                                                                                                  | $1.68 \times 10^{-12} \times e^{500/T}$                                                        | RCHO + 0.9(MO2 + HO <sub>2</sub> ) + 0.1 ACTA                                                                                     | $1.87 \times 10^{-12} \times e^{500/T}$ |
|               | RCHO + ACTA                                                                                                                   | $1.87 \times 10^{-13} \times e^{500/T}$                                                        |                                                                                                                                   |                                         |
| MCO3 + B3O2   | ACET + MO2 + HO <sub>2</sub>                                                                                                  | $1.68 \times 10^{-12} \times e^{500/T}$                                                        | ACET + 0.9(MO2 + HO <sub>2</sub> ) + 0.1 ACTA                                                                                     | $1.87 \times 10^{-12} \times e^{500/T}$ |
|               | ACET + ACTA                                                                                                                   | $1.87 \times 10^{-13} \times e^{500/T}$                                                        |                                                                                                                                   |                                         |
| MCO3 + PO2    | CH <sub>2</sub> O + MO2 + ALD2 + HO <sub>2</sub>                                                                              | $1.68 \times 10^{-12} \times e^{500/T}$                                                        | 0.9(CH <sub>2</sub> O + MO2 + ALD2 + HO <sub>2</sub> ) +<br>0.1 ACTA + 0.065 HAC + 0.035 RCHO                                     | $1.87 \times 10^{-12} \times e^{500/T}$ |
|               | ACTA + 0.65 HAC + 0.35 RCHO                                                                                                   | $1.87 \times 10^{-13} \times e^{500/T}$                                                        |                                                                                                                                   |                                         |
| MCO3 + R4O2   | MO2 + 0.32(OTHRO2 + ACET<br>+ ALD2) + 0.27 HO <sub>2</sub> +<br>0.19 MEK + 0.18 B3O2 +<br>0.13 RCHO + 0.05 A3O2<br>MEK + ACTA | $1.68 \times 10^{-12} \times e^{500/T}$<br><br><br><br>$1.87 \times 10^{-13} \times e^{500/T}$ | 0.9 MO2 + 0.288(ACET + ALD2 + OTHRO2)<br>+ 0.271 MEK + 0.243 HO <sub>2</sub> + 0.162 B3O2<br>+ 0.117 RCHO + 0.1 ACTA + 0.045 A3O2 | $1.87 \times 10^{-12} \times e^{500/T}$ |
|               | MO2 + NO <sub>2</sub> + 0.75 ALD2<br>+ 0.57 RCHO + 0.39 CH <sub>2</sub> O<br>+ 0.3 R4O2<br>MEK + ACTA                         | $1.68 \times 10^{-12} \times e^{500/T}$<br><br><br><br>$1.87 \times 10^{-13} \times e^{500/T}$ |                                                                                                                                   |                                         |
| MCO3 + R4N1   | NO <sub>2</sub> + 0.9MO2 + 0.675 ALD2 + 0.613 RCHO<br>+ 0.351 CH <sub>2</sub> O + 0.27 R4O2 + 0.1 ACTA                        | $1.87 \times 10^{-12} \times e^{500/T}$                                                        |                                                                                                                                   |                                         |

<sup>a</sup>See Table S1 for species names; <sup>b</sup>In units cm<sup>3</sup> molecule<sup>-1</sup> s<sup>-1</sup> unless otherwise noted; <sup>c</sup>Overall rate updated per JPL; see Table 1

60 **S5 Additional impacts of updates**

Figure S11 shows changes in NO<sub>y</sub> species between the base and updated mechanism, analogous to Figure 2 in the main text but displaying relative changes instead of absolute. Figures S12-S15 show vertical profiles of zonally averaged changes in species' annually averaged mixing ratios between the base and updated mechanism, equivalent to the profiles in Figures 1-3 and 5 of the main text but on log-pressure vertical axes. Table S4 lists the effects of the updated reactions on the annually averaged tropospheric burdens of all species that change by >1% between simulations with the old and new mechanism. Table S5 provides an analogous list for changes in stratospheric burdens, and only includes species for which >10% of the total atmospheric burden is contained in the stratosphere. Expanded tables listing the effects on every GEOS-Chem species, along with maps of the absolute and relative changes in annual average burdens of each species (without the 1% threshold) at the surface, at 500 hPa, and throughout the atmospheric column (zonally averaged), can be found on the Harvard data repository (DOI 10.7910/DVN/IDYV3E).

Table S5: Changes in annual average tropospheric burdens from the base mechanism to the updated mechanism.<sup>a</sup>

| Species name | Tropospheric burden (Gg) <sup>b</sup> | Absolute change (Gg) | Relative change (%) |
|--------------|---------------------------------------|----------------------|---------------------|
| A3O2         | 0.0987                                | -0.00194             | -1.93               |
| ACET         | 5520                                  | 188                  | 3.54                |
| ACTA         | 348                                   | -12.1                | -3.37               |
| ALD2         | 305                                   | 3.38                 | 1.12                |
| AROMP4       | 0.166                                 | -0.00204             | -1.22               |
| AROMRO2      | 0.127                                 | -0.00145             | -1.13               |
| B3O2         | 0.417                                 | 0.0492               | 13.4                |
| BENZO        | 0.00969                               | -0.000127            | -1.30               |
| BENZO2       | 0.346                                 | -0.00365             | -1.04               |
| BrNO2        | 0.0977                                | -0.00287             | -2.86               |
| BrNO3        | 5.80                                  | -0.0886              | -1.51               |
| BRO2         | 0.0761                                | -0.000832            | -1.08               |
| C2H4         | 121                                   | -2.17                | -1.77               |
| C3H8         | 494                                   | -97.5                | -16.5               |
| C4HVP1       | 0.00187                               | -0.000063            | -3.24               |
| C4HVP2       | 0.00530                               | -0.000056            | -1.05               |
| CH2OO        | 0.000005                              | 0.000002             | 86.9                |
| CH3CHOO      | 0.000009                              | -0.000001            | -8.38               |
| Cl           | 0.00014                               | 0.000002             | 1.36                |
| Cl2          | 1.04                                  | 0.0198               | 1.94                |
| Cl2O2        | 0.000516                              | 0.000111             | 27.4                |
| ClO          | 0.299                                 | 0.0119               | 4.14                |
| ClOO         | 0.000014                              | <1E-6                | 3.02                |
| CO           | 286000                                | -8080                | -2.75               |
| CO2          | 159                                   | 6.68                 | 4.38                |

*Continued on next page*

*Continued from previous page*

| Species name | Tropospheric burden (Gg) <sup>b</sup> | Absolute change (Gg) | Relative change (%) |
|--------------|---------------------------------------|----------------------|---------------------|
| ETHLN        | 0.809                                 | 0.0573               | 7.63                |
| ETHN         | 2.48                                  | -0.0379              | -1.51               |
| ETHP         | 41.2                                  | -0.660               | -1.58               |
| ETO          | <1E-6                                 | <1E-6                | -1.11               |
| ETOO         | 0.330                                 | -0.0124              | -3.62               |
| ETP          | 86.4                                  | 5.73                 | 7.10                |
| H            | <1E-6                                 | <1E-6                | -21.5               |
| H2O2         | 2750                                  | 34.6                 | 1.28                |
| HCOOH        | 554                                   | 16.7                 | 3.10                |
| HMHP         | 31.4                                  | -8.67                | -21.7               |
| HMML         | 12.3                                  | -0.242               | -1.94               |
| HNO2         | 2.93                                  | -0.0375              | -1.27               |
| HNO4         | 67.5                                  | 1.52                 | 2.30                |
| HPALD1       | 2.60                                  | -0.132               | -4.84               |
| HPALD1O      | 0.00554                               | -0.000509            | -8.42               |
| HPALD2       | 7.40                                  | -0.0957              | -1.28               |
| HPALD2O      | 0.0169                                | -0.000765            | -4.32               |
| HPALD3       | 2.14                                  | -0.0901              | -4.04               |
| HPALD4       | 5.08                                  | -0.0551              | -1.07               |
| HPETHNL      | 3.78                                  | -0.119               | -3.06               |
| I            | 0.819                                 | -0.0122              | -1.47               |
| I2O3         | 0.114                                 | -0.00180             | -1.55               |
| I2O4         | 0.00216                               | -0.000133            | -5.79               |
| ICHOO        | 0.00120                               | 0.000019             | 1.63                |
| ICPDH        | 4.44                                  | 0.0777               | 1.78                |
| IDHDP        | 10.9                                  | 0.247                | 2.33                |
| IDHNBOO      | 0.992                                 | -0.0187              | -1.86               |
| IDHNDOO      | 0.00207                               | 0.000055             | 2.71                |
| IDHNDOO      | 0.00150                               | 0.000017             | 1.15                |
| IEPOXAO      | 0.00931                               | 0.000309             | 3.44                |
| IEPOXBO      | 0.00371                               | 0.000124             | 3.45                |
| IHN1         | 1.84                                  | 0.0260               | 1.44                |
| IHN4         | 0.426                                 | 0.00423              | 1.00                |
| IHO01        | 1.02                                  | -0.0241              | -2.30               |
| IHPOO2       | 0.00336                               | 0.000059             | 1.80                |
| IHPOO3       | 0.0214                                | 0.000273             | 1.29                |
| IHPNBOO      | 0.00182                               | 0.000019             | 1.06                |
| INA          | <1E-6                                 | <1E-6                | 1.56                |
| INO          | 0.00254                               | -0.000161            | -5.96               |
| INO2B        | 1.08                                  | 0.0126               | 1.18                |
| INPB         | 3.86                                  | 0.0509               | 1.34                |
| INPD         | 4.23                                  | 0.0446               | 1.07                |
| IONO         | 0.136                                 | -0.0138              | -9.17               |

*Continued on next page*

*Continued from previous page*

| Species name | Tropospheric burden (Gg) <sup>b</sup> | Absolute change (Gg) | Relative change (%) |
|--------------|---------------------------------------|----------------------|---------------------|
| IONO2        | 2.14                                  | -0.0279              | -1.28               |
| IPRNO3       | 51.8                                  | 4.09                 | 8.57                |
| ISOPNOO      | 0.00554                               | 0.000125             | 2.30                |
| ISOPNOO      | 0.00414                               | 0.000062             | 1.51                |
| ITHN         | 10.0                                  | 0.133                | 1.34                |
| KO2          | 1.07                                  | -0.0159              | -1.47               |
| LIMO2        | 0.0287                                | -0.00228             | -7.34               |
| LVOC         | 0.0967                                | 0.00170              | 1.79                |
| LVOCOA       | 14.4                                  | 0.228                | 1.60                |
| MACR         | 63.4                                  | -1.39                | -2.15               |
| MACR100      | 0.0594                                | -0.00198             | -3.23               |
| MACR100      | 5.22                                  | -0.0822              | -1.55               |
| MAP          | 670                                   | 194                  | 40.9                |
| MCRDH        | 10.1                                  | 0.107                | 1.07                |
| MCO3         | 1.39                                  | -0.0632              | -4.34               |
| MCROHOO      | 0.00671                               | -0.000247            | -3.55               |
| MEK          | 367                                   | 9.71                 | 2.72                |
| MO2          | 24.9                                  | 0.280                | 1.14                |
| MP           | 2320                                  | 28.7                 | 1.25                |
| MPAN         | 7.09                                  | -0.132               | -1.82               |
| MVKDH        | 54.0                                  | 0.608                | 1.14                |
| MVKOHOO      | 0.603                                 | -0.0126              | -2.05               |
| MVKN         | 2.73                                  | 0.774                | 39.4                |
| N            | <1E-6                                 | <1E-6                | -48.9               |
| N2O5         | 25.5                                  | -0.393               | -1.52               |
| NO           | 58.0                                  | -1.42                | -2.38               |
| NO2          | 291                                   | -3.03                | -1.03               |
| NPRNO3       | 10.8                                  | -0.929               | -7.94               |
| OIO          | 0.152                                 | -0.00327             | -2.10               |
| OLND         | 0.547                                 | -0.0146              | -2.59               |
| OLNN         | 0.0701                                | -0.00248             | -3.42               |
| OTHRO2       | 0.599                                 | 0.0574               | 10.6                |
| PAN          | 1430                                  | -56.5                | -3.81               |
| PIO2         | 0.393                                 | -0.0221              | -5.32               |
| PO2          | 0.218                                 | -0.0115              | -5.01               |
| PP           | 26.6                                  | -0.533               | -1.96               |
| PPN          | 292                                   | 24.2                 | 9.04                |
| PRN1         | 0.250                                 | -0.00928             | -3.58               |
| PRPE         | 35.0                                  | -0.854               | -2.38               |
| RA3P         | 17.4                                  | -0.781               | -4.29               |
| RB3P         | 47.6                                  | 5.34                 | 12.6                |
| RCHO         | 69.6                                  | 4.78                 | 7.37                |
| RCO3         | 0.243                                 | 0.0246               | 11.2                |

*Continued on next page*

Continued from previous page

| Species name | Tropospheric burden (Gg) <sup>b</sup> | Absolute change (Gg) | Relative change (%) |
|--------------|---------------------------------------|----------------------|---------------------|
| ROH          | 5.03                                  | 0.877                | 21.1                |
| RP           | 62.1                                  | 7.53                 | 13.8                |
| TRO2         | 0.0733                                | -0.00131             | -1.76               |
| XRO2         | 0.0562                                | -0.00105             | -1.82               |

<sup>a</sup>Only species with changes of >1% are listed; see Table S1 for species names; <sup>b</sup>In a simulation with the updated mechanism.

Table S6: Changes in annual average stratospheric burdens from the base mechanism to the updated mechanism.<sup>a</sup>

| Species name | Stratospheric burden (Gg) <sup>b</sup> | % of total burden in stratosphere <sup>b</sup> | Absolute change (Gg) | Relative change (%) |
|--------------|----------------------------------------|------------------------------------------------|----------------------|---------------------|
| BrO          | 8.12                                   | 80                                             | -0.104               | -1.26               |
| BrSALA       | 0.0841                                 | 27                                             | 0.00752              | 9.81                |
| CHCl3        | 19.9                                   | 12                                             | -1.24                | -5.88               |
| Cl2          | 2.62                                   | 72                                             | 0.0338               | 1.30                |
| ClO          | 42.6                                   | 99                                             | -1.76                | -3.97               |
| ClOO         | 0.000512                               | 97                                             | 0.000007             | 1.39                |
| H            | 0.000301                               | >99                                            | -0.000076            | -20.2               |
| HBr          | 0.826                                  | 16                                             | 0.0512               | 6.60                |
| HCl          | 681                                    | 76                                             | 6.96                 | 1.03                |
| HNO2         | 1.19                                   | 29                                             | 0.0286               | 2.46                |
| HNO3         | 4880                                   | 79                                             | 75.6                 | 1.57                |
| HO2          | 5.99                                   | 19                                             | -0.0790              | -1.30               |
| HOBr         | 4.20                                   | 52                                             | -0.0475              | -1.12               |
| HOCl         | 24.8                                   | 90                                             | -1.49                | -5.67               |
| I            | 0.261                                  | 24                                             | -0.00862             | -3.19               |
| I2O2         | 0.0172                                 | 48                                             | 0.000484             | 2.89                |
| INO          | 0.0009                                 | 26                                             | -0.000134            | -13.0               |
| IONO         | 0.125                                  | 48                                             | -0.0140              | -10.1               |
| N            | 0.000092                               | >99                                            | -0.000012            | -11.5               |
| N2O5         | 523                                    | 95                                             | 33.5                 | 6.84                |
| NIT          | 45.3                                   | 10                                             | 0.951                | 2.15                |
| NO           | 524                                    | 90                                             | 38.4                 | 7.91                |
| NO2          | 1510                                   | 84                                             | 99.2                 | 7.03                |
| O1D          | 0.000026                               | >99                                            | -0.000001            | -3.70               |
| OCIO         | 3.25                                   | 98                                             | -0.168               | -4.91               |
| OIO          | 0.0525                                 | 26                                             | 0.00464              | 9.69                |
| PPN          | 74.3                                   | 20                                             | 4.76                 | 6.84                |

<sup>a</sup>Only species with changes of >1% and for which >10% of the total burden is contained in the stratosphere are listed; see Table S1 for species names;

<sup>b</sup>In a simulation with the updated mechanism.

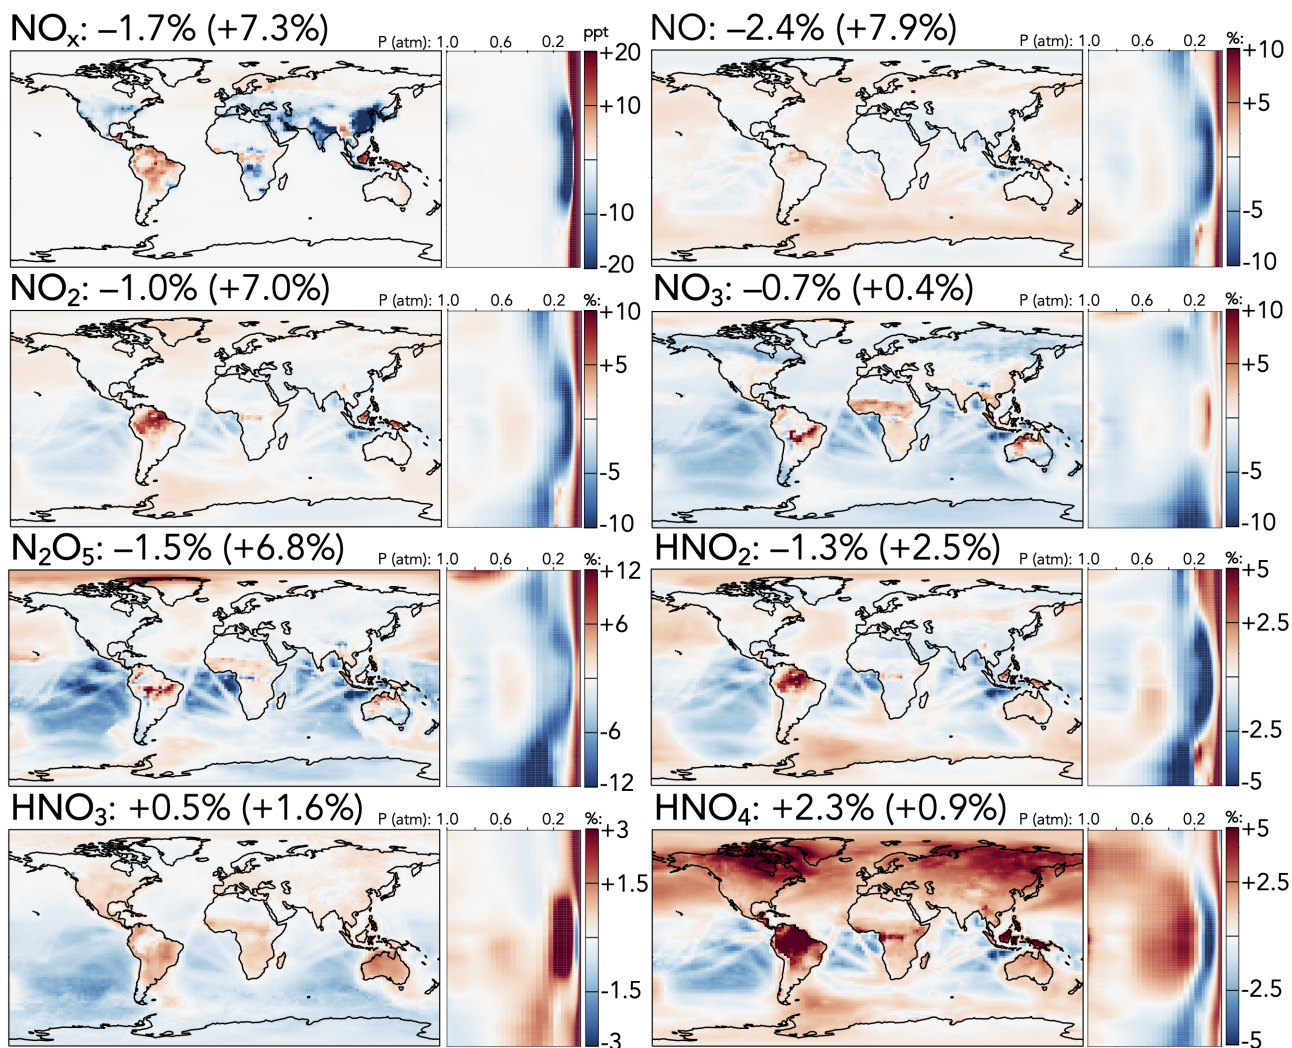

**Figure S11.** Relative (top left, for  $\text{NO}_x$ ) and absolute (all others) changes in the annual average mixing ratios of  $\text{NO}_z$  species between the base and updated mechanism. Maps show surface values; atmospheric cross-sections show zonal means using the labelled altitude scale and the same latitude scales as the maps to their left. Scales differ between species but are the same for each individual species' surface maps and cross-sections. Numbers next to species names show the percent change in their annual average tropospheric burden (stratospheric burden in parentheses) from the base to the updated mechanism.



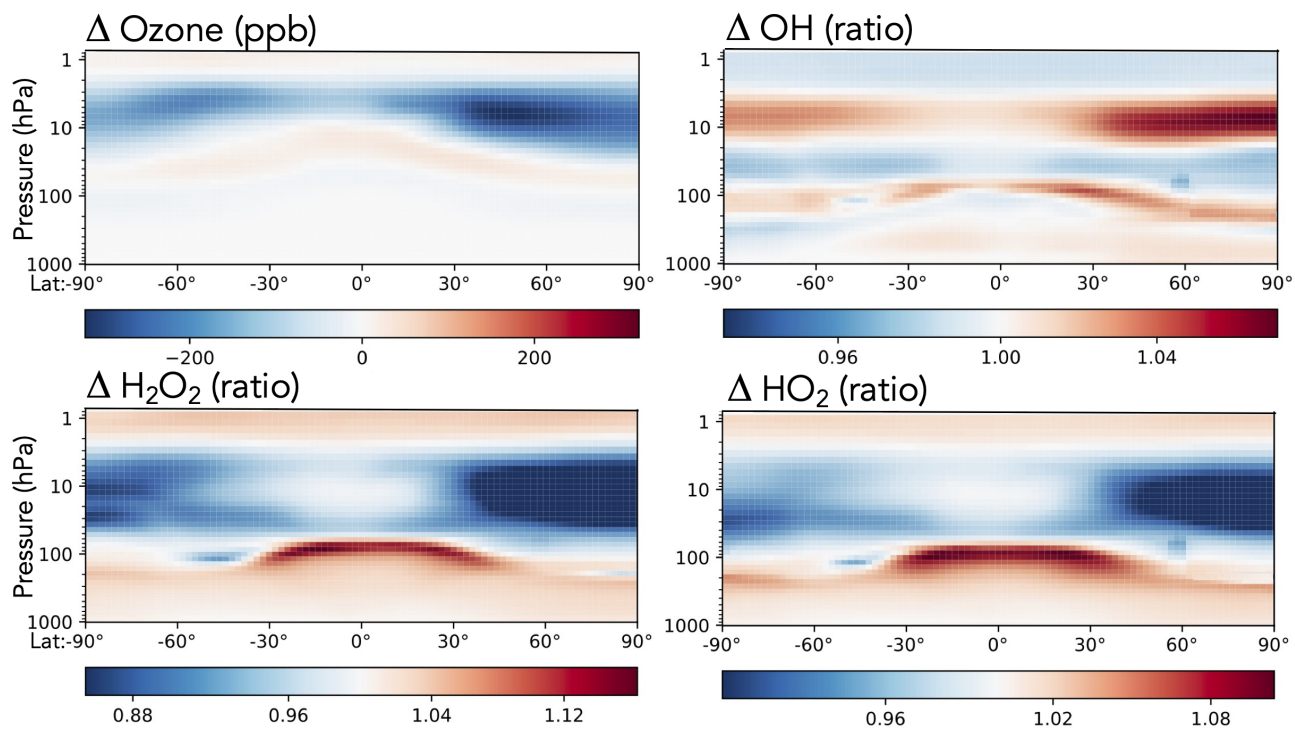

**Figure S12.** Absolute (top left, for ozone) and relative (all others) changes in the vertical profiles of zonal mean annual average mixing ratios of  $(\text{HO})_y$  species between the base and updated mechanism. Scales differ between species and, for relative scales, show to the value of  $[(\text{updated} - \text{base}) / \text{base}]$  mixing ratios. Plotted values are equivalent to those in the zonal profiles of Figure 1 in the main text, but on log-pressure axes.

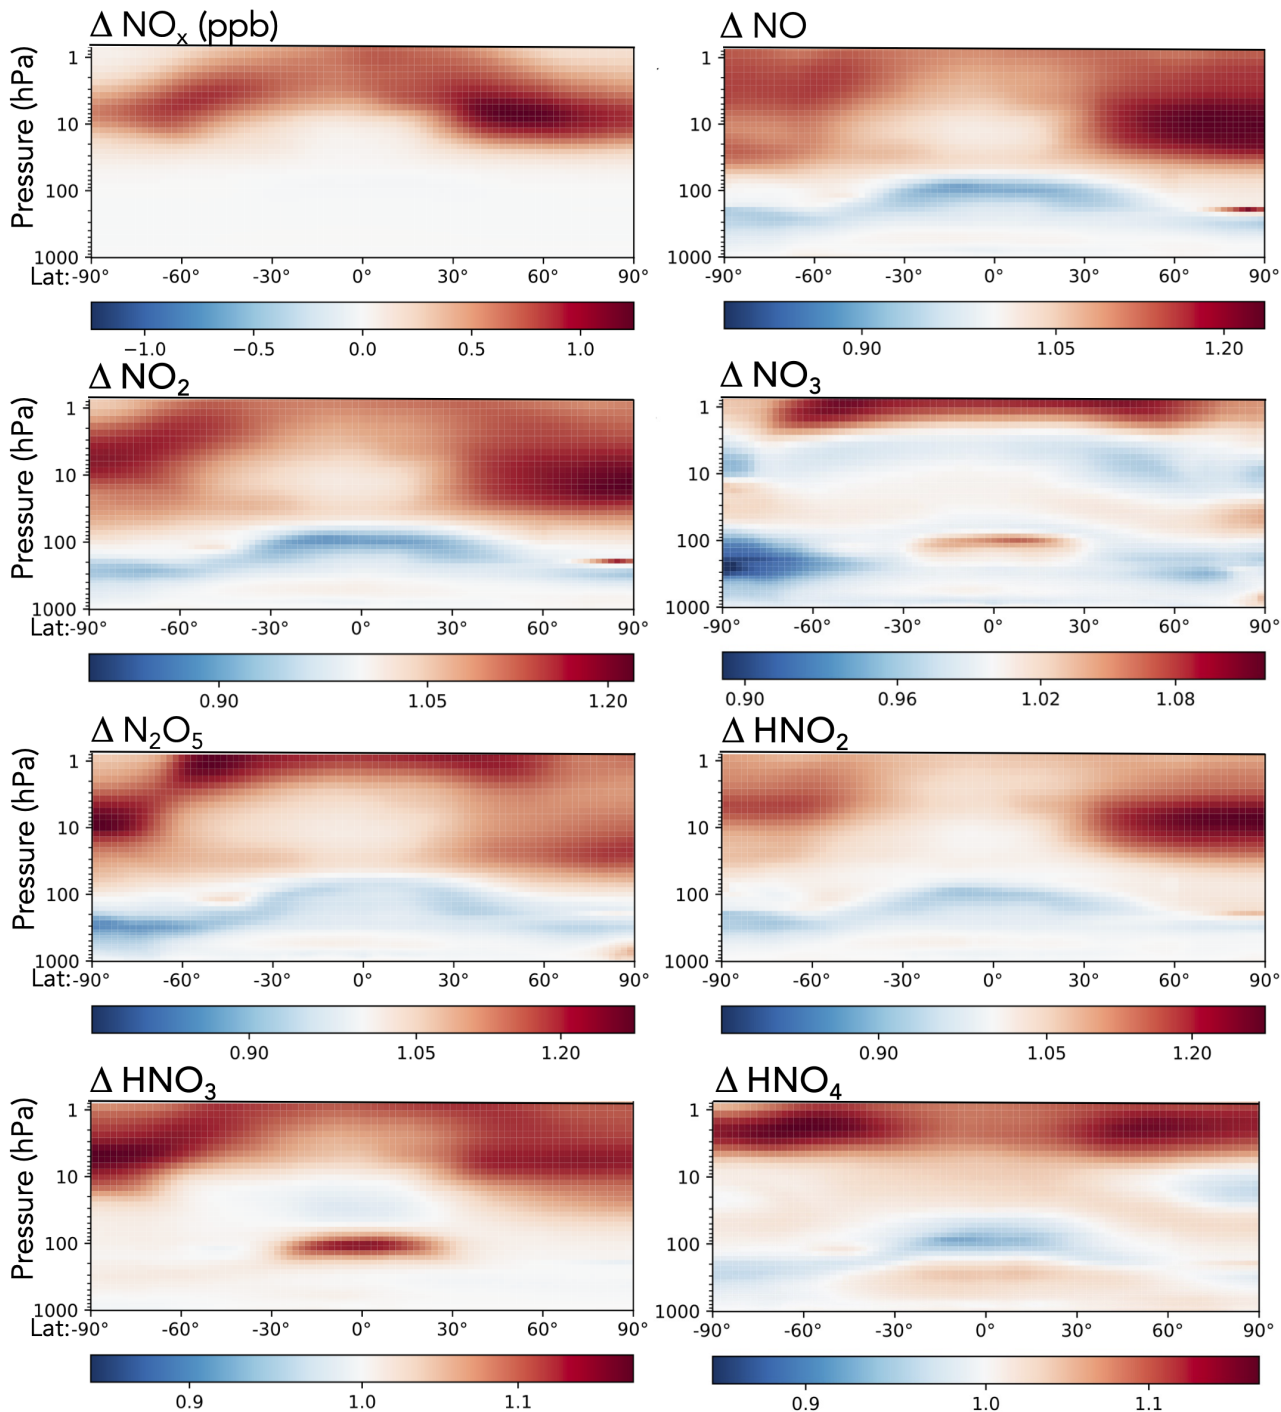

**Figure S13.** Absolute (top left, for ozone) and relative (all others) changes in the vertical profiles of zonal mean annual average mixing ratios of  $\text{NO}_y$  species between the base and updated mechanism. Scales differ between species and, for relative scales, show to the value of  $[(\text{updated} - \text{base}) / \text{base}]$  mixing ratios. Plotted values are equivalent to those in the zonal profiles of Figure S11, but on log-pressure axes.

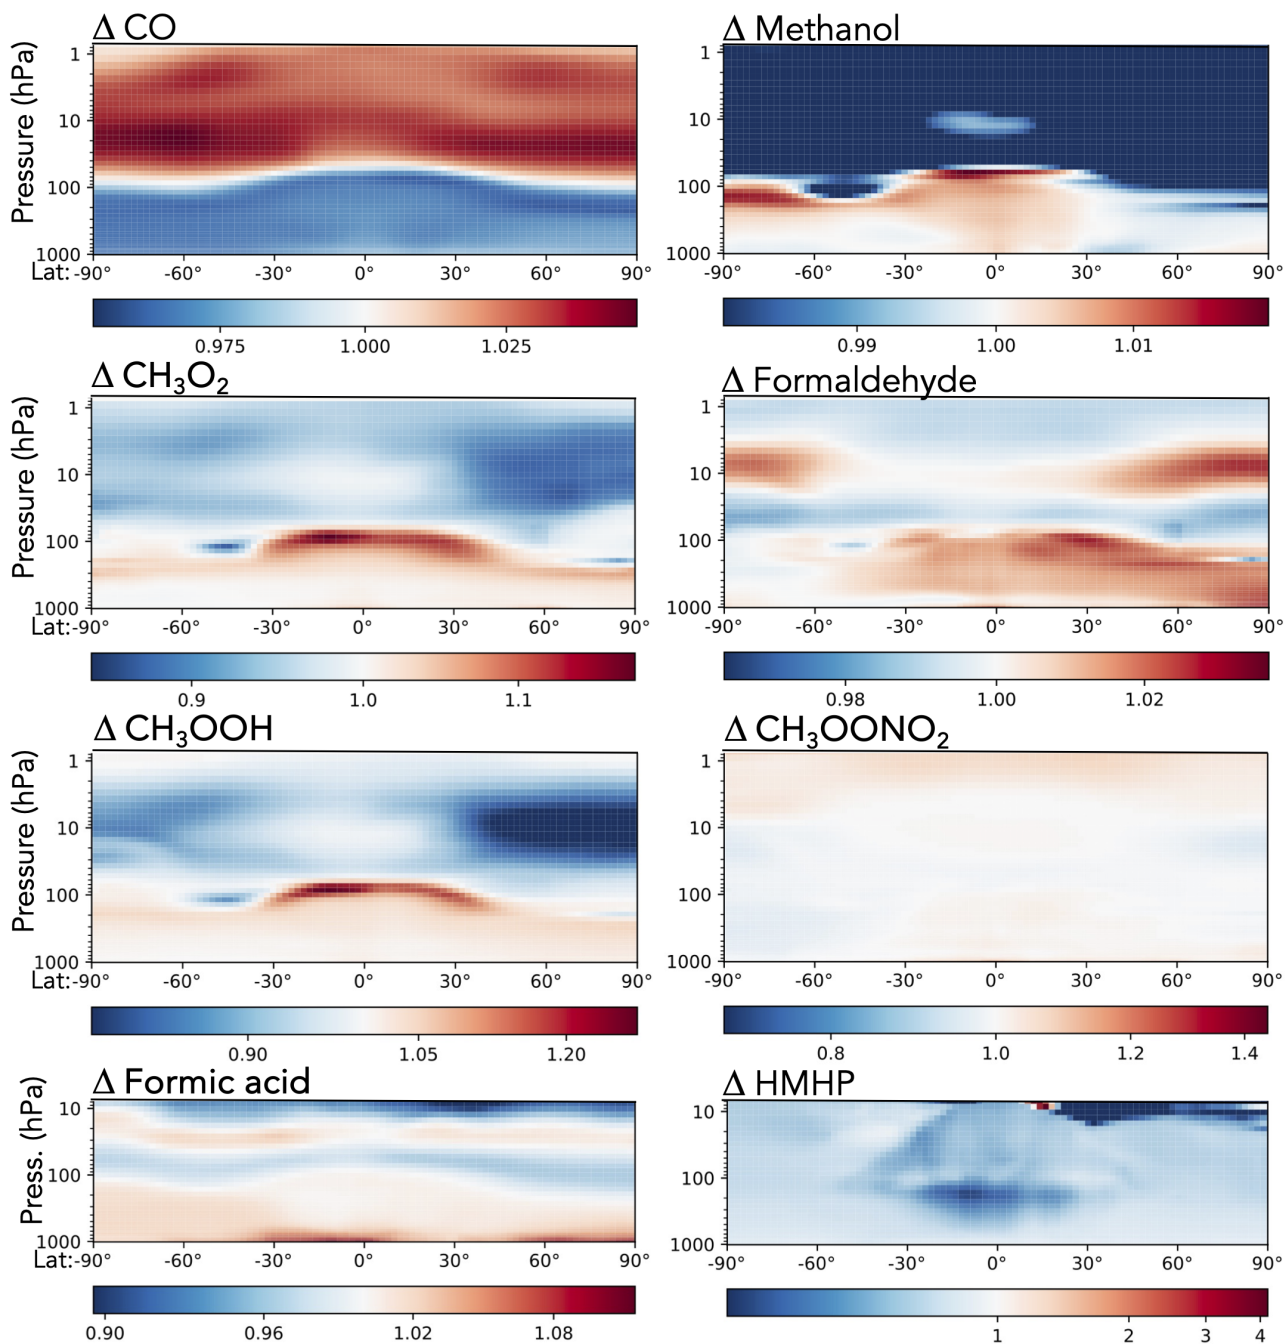

**Figure S14.** Relative changes in the vertical profiles of zonal mean annual average mixing ratios of C<sub>1</sub> species between the base and updated mechanism. Scales differ between species and show to the value of [(updated - base) / base] mixing ratios. Plotted values are equivalent to those in the zonal profiles of Figure 3 in the main text, but on log-pressure axes.

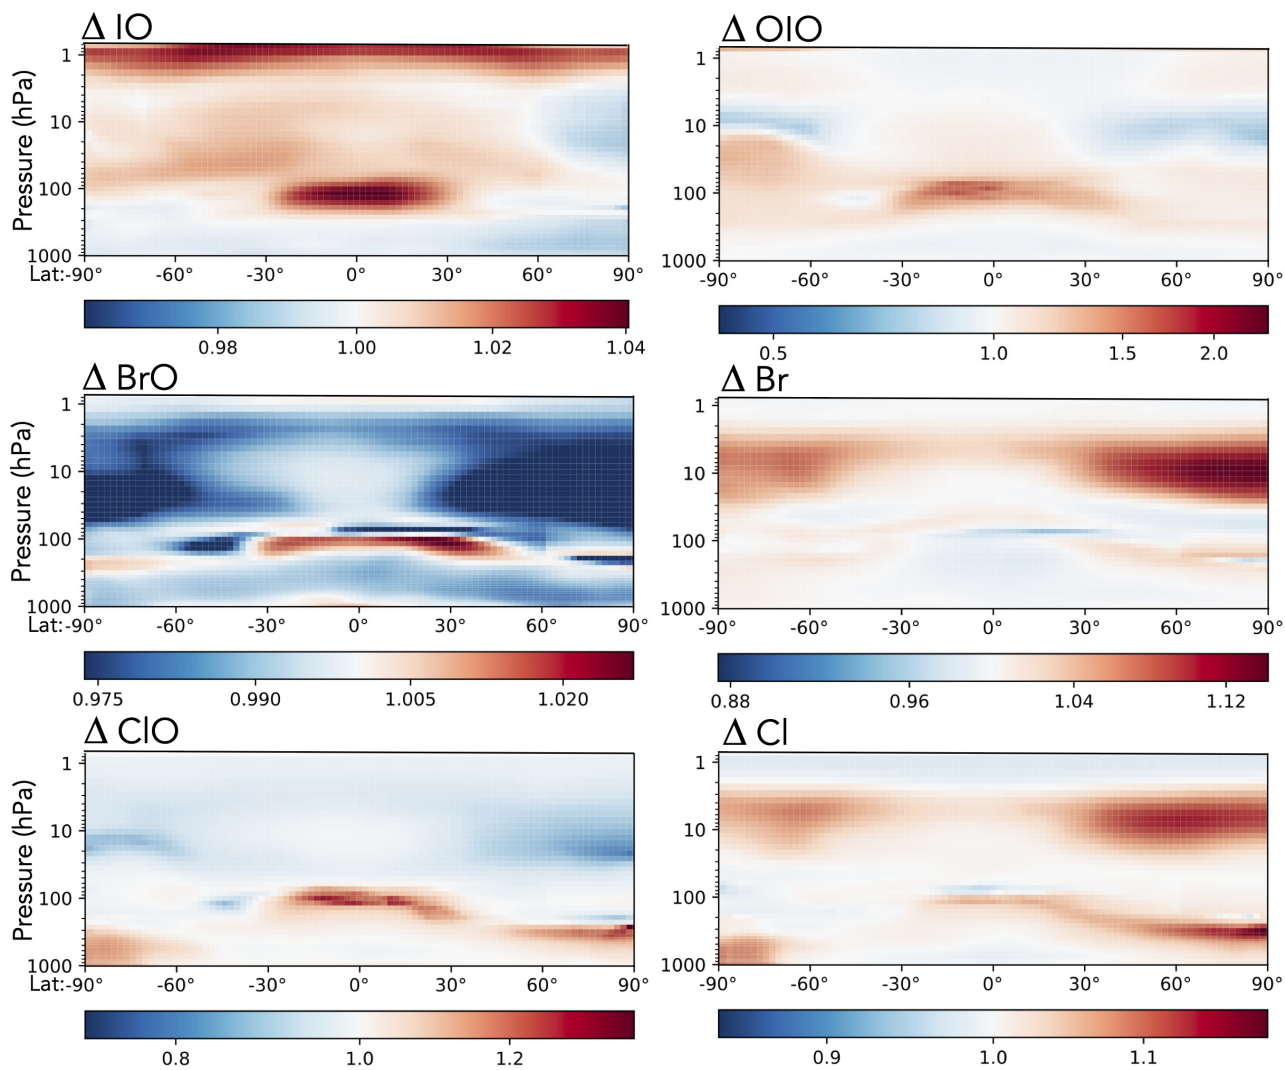

**Figure S15.** Relative changes in the vertical profiles of zonal mean annual average mixing ratios of select halogen species between the base and updated mechanism. Scales differ between species and show to the value of  $[(\text{updated} - \text{base}) / \text{base}]$  mixing ratios. Plotted values are equivalent to those in the zonal profiles of Figure 5 in the main text, but on log-pressure axes.
